# Supplementary material for: Distinct lipidomic profiles but similar improvements in aerobic capacity following sprint interval training versus moderate-intensity continuous training in male adolescents
Source: Front Physiol. 2025 Jan 30;16:1475391. doi: 10.3389/fphys.2025.1475391 (PMC11821953; doi:10.3389/fphys.2025.1475391)
Supplement: Supplementary file 2 [file Table1.xlsx]

## Sheet: MICT(A-pre;B-post)
	1A	2A	3A	4A	5A	6A	7A	8A	9A	10A	11A	12A	1B	2B	3B	4B	5B	6B	7B	8B	9B	10B	11B	12B
FFA 12_0	522.15	1124.09	259.6	448.63	802.5	1341.59	1043.3	1109.63	792.62	291.49	552.33	2342.26	412.73	345.81	697.92	306.19	358.94	652.71	431.52	1071.75	722.66	356.15	490.02	2061.88
FFA 12_1	143.55	172.37	114.43	74.09	102.9	109.63	319.65	203.4	269.27	77.44	210.65	315.74	69.26	61.67	65.36	67.65	52.82	136.5	167.53	109.38	271.55	109.6	67.75	285.89
FFA 14_0	1749.51	2074.06	1148.37	1111.96	2212.27	2148.73	2654.54	1770.84	2068.85	1237.11	2273.79	3738.78	1573.69	1239.46	1454.04	1021.11	1375.64	1971.51	1350.96	1929.31	1955.85	1599.57	1784.73	2952.38
FFA 14_1	274.08	339.38	172.21	113.76	288.47	321.6	565.85	313.49	459.26	125.47	448.84	675.91	175.7	124.05	106.93	122.42	136.18	288.6	252	212.43	469.79	263.99	198.26	602.13
FFA 16_0	9958.37	10483.4	9308	9241.76	9740.84	9540.5	10793.6	9910.62	10309.4	8975.7	10595.9	11052.2	9596.04	9591.4	9596.37	9000.2	9636.6	10229.1	9792.65	9775.65	10368.9	9477.47	10363.4	10961.8
FFA 16_1	4409.48	5180.72	2576.17	2235.8	5689.63	3752.94	6222.9	4032.79	6011.54	1991.65	5740.2	8022.08	3777.6	2394.52	3106.13	2185.23	3391.44	5029.72	4431.02	4242.19	4532.75	3847.99	4129.96	7083.98
FFA 16_2	131.34	125.97	84.6	67.46	142.66	80.84	243.45	118.71	139.98	55.13	226.28	206.77	89.36	68.76	121.01	65.02	77.44	118.78	89.71	80.93	159.58	93.3	159.82	199.95
FFA 17_0	758.96	757.23	509.19	673.61	559.24	1236.33	1162.13	578.41	782.74	595.5	858.73	919.12	693.35	779.84	631.97	524.28	677.13	1083.32	728.4	630.65	1026.95	860.83	939.82	1007.9
FFA 17_1	223.6	338.78	124.37	106.53	234.13	427.24	273.25	154.88	305.21	126.63	274.19	416.35	187.19	172.01	170.15	93.74	152.35	369.17	213.66	169.47	264.75	236.74	247.8	346.43
FFA 18_0	10122.4	10833.4	9196.94	8600.43	9918.64	10596.1	11732.9	10112.5	10634.5	9298.48	11275.5	9805.38	9708.7	10134.5	10405.4	9145.23	10023	10108.2	9588.26	10380.8	9994.81	9890.45	10947.6	10159.6
FFA 18_1	12282.3	13385.6	11230.5	11104.6	12440.2	12121.7	13712.4	12019	13414.1	10466.5	13655.3	14412	11701.8	11324	12202	10619.2	11431.2	13506.2	12491	12233.8	13492	11562	12726.4	14252.3
FFA 18_2	11496	11844.1	10429.5	10090.1	12053.4	9841.49	12884.8	11084.2	12464.5	9345.87	12948.1	13283.5	10655.9	10092.8	10585.5	9605.85	10283.3	11443.1	11118.3	10924.4	12322.5	10200.3	12151.7	13163.8
FFA 18_3	4557.66	4315.89	3327.42	1986.98	4763.5	2386.31	6898.57	3719.41	4725.45	1906.45	7143.51	6811.16	2807.84	2131.57	2534.57	1863.54	2306.21	3126.19	3028.64	3245.33	4384.54	2380.03	5473.35	6080.8
FFA 18_4	37.32	31.08	19.98	6.89	42.44	34.68	55.5	62.54	34.87	12.31	86.04	64.51	21.49	10.89	37.69	9.43	22.15	30.79	21.85	32.1	37.97	24.16	56.07	64.41
FFA 20_0	385.95	512.7	518.69	485.56	426.89	372.56	812.38	708.7	424.11	500.65	517.61	409.83	438.8	484.03	362.13	315.48	316.58	492.79	417.41	445.68	534.91	504.98	407.29	424.69
FFA 20_1	567.41	750.71	457.07	451.35	576.54	572.33	1755.69	576.87	1007.46	284.82	904.95	1026.37	504.75	481.82	655.68	342.8	500.85	858.21	1017.54	733.57	1081.39	958.76	758.36	1222.11
FFA 20_2	714.27	912.14	478.09	483.65	861.78	569.52	1301.85	968.39	1165.11	295.29	1187.92	1322.3	450.78	529.78	516.76	466.13	603.9	875.2	740.33	689.26	1230	609.37	731.18	1251.68
FFA 20_3	957.62	937.17	594.24	589.99	941.74	703.35	1167.8	1132.88	1149.22	414.8	1369.12	1324.43	573.47	555.79	537.86	481.99	625.75	954.16	661.9	727.4	1211.4	600.04	874.14	1079.77
FFA 20_4	2651.16	2380.21	1706.33	1510.05	2463.55	1852.52	3000.93	3131.45	2943.31	1203.29	3933.88	3713.09	1751.63	1615.4	1375.03	1092.49	1704.08	2864.44	1672.94	2331.63	3393.34	1689.11	2246.48	3495.73
FFA 20_5	30.59	58	83.55	91.07	43.96	18.35	16.94	73.31	27.05	102.49	49.6	40.824	98.57	130.69	282.72	32.87	20.31	46.86	26.47	16.02	16.67	27.02	54.92	46.81
FFA 22_0	424.85	499.03	257.4	408.74	259.76	179.09	628.04	757.15	208.57	430.55	466.35	344.35	340.87	294.19	212.12	188.03	36.58	271.22	238.58	307.5	332.91	403.4	414.93	248.68
FFA 22_1	259.63	243.79	287.53	216.61	224.67	234.88	1260.69	241.3	311.97	198.29	275.68	297.18	214.05	238.3	221.34	200.8	237.14	235.61	781.19	268.74	277.17	1208.53	234.64	296.48
FFA 22_2	13.03	20.401	10.55	20.5922	29.8811	14.95	83.1	58.51	24.809	14.6	28.136	76.18	3.51	14.5644	8.57	4.99	7.47	21.35	16.69	30.09	20.36	16.231	6.95	22.7022
FFA 22_3	26.17	44.86	12.95	35.23	2.37	43.63	31.7911	47.65	23.5	30.02	2.65	0.24	46.92	32.07	2.1	41.81	2.87	0.1	70.9	2.23	91.11	51.96	90.84	87.54
FFA 22_4	424.66	521.24	208.62	155.95	470.6	344.65	669.67	628.1	614.04	149.43	814.33	780.47	201.2	207.07	198.57	193.52	370.49	538.41	410.99	549.76	736.55	261.79	470.35	786.93
FFA 22_5	862.69	937.37	536.29	432.57	797.73	622.65	1292.19	1185.59	954.93	404.42	1441.67	1289.27	493.73	517.99	531.08	376.8	669.06	932.31	683.72	837.1	1157.08	572.44	723.26	1136.42
FFA 22_6	1148.37	1385.9	870.24	651.65	1165.4	1107.63	2178.73	1698.83	1644.71	737.72	2067.25	1509.24	686.37	855.98	633.46	487.81	905.8	1539.02	1220.99	1027.48	1806.29	860.85	1024.96	1497.59
LPA 16_0	517.24	383.43	570.49	557.58	566.46	442.5	550.81	517.54	287.2	562.37	479.46	532	542.65	563.95	264.59	464.49	528.04	431.89	504.19	468.81	418.85	187.48	444.61	496.82
LPA 16_1	7.01	1.22	10.8	4.73	18.79	4.1	8.131	16.02	8.36	4.78	1.25	14.73	11.07	6.07	19.42	6.1	18.42	4.46	4.85	7.2	7.96	4.74	3.8	7.467
LPA 18_0	214.66	285.52	316.14	305.33	291.68	231.63	319.18	231.12	228.77	250.18	283.71	252.51	226.56	251.68	314.64	240.99	223.38	187.04	273.99	219.6	199.39	207.01	222.87	217.31
LPA 18_1	138.93	145.24	164.34	152.59	201.19	176.64	154.68	189.58	141.83	190.34	138.98	151.5	148.4	159.24	208.49	143.69	203.81	149.56	148.77	222.73	177.43	162.56	116.5	157.52
LPA 18_2	320.56	341.17	356.95	314.43	349	354.07	306.67	339.98	292.58	387.76	284.06	289.74	323.55	335.94	463.84	359.89	494.16	270	285.46	439.76	425.16	287.23	327.48	369.77
PA 18_0-20_3	197.55	157.64	249.35	350.98	195.87	308.72	254.06	265.37	198.55	160.06	476.35	72.07	152.64	264.2	184.83	280.92	308.08	194.8	253.59	65.92	244.55	243.13	88.94	310.15
PC 16_0-22_3	218.34	244.84	182.07	129.28	253.79	103.15	126.77	206.61	120.92	131.24	61.43	219.71	158.62	97.22	148.74	112.39	52.04	279.77	219.23	57.68	174.92	56.31	152.97	98.18
PC 16_0-22_5	5762.81	8131.21	6330.78	4532.12	6344.91	5229.55	2443.64	2372.66	4378.12	4444.5	2852.9	6452.54	3749.42	3050.88	5221.07	3746.04	3359.53	6177.18	5255.28	5448.53	4079.72	5052.22	6100.31	6803.94
PC 16_0-22_6	11493.3	15179.6	13950.4	10192.4	15024.2	10269.9	6021.59	6552.72	13681.2	10691.8	11413.9	5361.06	10731.5	7099.34	4363.1	8235.13	6395.52	10429.1	7802.81	11290	8887.12	8438.38	12746	8877.19
PC 16_1-20_2	12.9033	12.8433	13.357	14.7	8.05	21.35	48.29	15.5563	4.39	9.4	10.301	18.49	81.88	52.27	13.13	14.8	18.14	38.04	55.51	1.15	19.3744	6.24	20.38	21.185
PC 16_1-20_4	439	237.41	583.93	435.52	352.23	423.36	150.12	427.45	251.52	455.56	548.05	589.01	374.56	291.76	595.55	448.65	411.89	435.15	134.55	383.01	430.6	639.29	327.82	231.66
PC 18_1-20_3	1212.76	1456.74	1245.81	1746.87	2146.07	1132.89	1180.81	1075.21	962.91	725.45	802.92	887.66	999.13	851.28	1381.91	1049.01	1265.62	1796.91	646.14	1776.69	1069.85	1890.35	1890.2	1157.19
PC 18_2-20_3	1366.98	1315.26	1760.74	1804.67	1863.6	796.13	733.88	1122.7	652.57	1343.1	731.05	1148.41	1333.56	1046	1659.05	1561.8	1633.32	858.81	551.21	1165.11	1229.84	1464.22	1142.04	1344.67
PC 18_2-20_4	2822.96	3070.44	3439.6	2363.97	2347.44	2847.02	1674.83	1671.74	2833.44	2994.71	2509.82	2530.6	3171.79	3039.84	3807.04	3143.58	2189.65	2889.85	1988.11	3579.19	3419.04	3127.82	4243.49	4201.68
PC 20_0-20_3	62.48	94.06	57.08	186.11	157.18	87.08	133.73	59.49	82.52	82.51	85.23	116.52	96.39	66.44	169.25	127.54	98.99	76.15	76.13	97.32	57.74	151.77	115.31	92.18
PE 14_0-22_5	11.094	12.983	30.53	10.413	19.556	10.85	2.52	13.339	11.222	12.62	14.513	29.69	7.67	16.93	43.26	11.668	33.1	1.26	3.91	27.33	13.743	11.4	15.469	3.23
PE 16_0-18_2	221.83	3897.96	620.25	440.77	2436.37	269.47	143.85	142.16	267.57	671.03	71.89	404.52	790.86	293.62	626	580.43	168.71	814.39	147.41	2815.67	474.2	607.81	4624.72	2258.09
PE 18_0-20_5	47.35	86.15	32.82	52.23	39.24	23.08	34.941	37.4767	5.79	21.62	53.55	47.1578	34.75	17.54	39.84	14.36	8.05	31.667	24.785	45.19	34.19	29.43	76.33	37.88
PE 18_1-18_1	629.69	1463.23	1486.72	1398.99	1448.03	729.9	185.82	205.74	313.27	1895.33	440.41	882.42	844.64	316.05	3005.58	787.86	520.27	1416.51	241.77	2282.82	783	1652.92	5188.78	2649.41
PE 18_1-18_2	2360.93	1704.43	7445.96	2798.13	1576.4	2863.4	297.85	1302.03	1593.89	8175.66	636.7	1689.9	3519.09	1205.81	12241.8	4190.28	547.32	396.3	1173.71	1132.6	4345.47	2579.7	2529.04	1075.95
PE 18_1-20_4	22.02	134.01	11.78	52.27	126.36	12.6	26.59	5.79	19.3	39.32	17.2	50.22	29.83	34.25	42.54	33.05	16.99	30.31	8.83	97.85	20.89	81.54	76	136.26
PI 16_0-18_0	73.95	123.98	122.24	170.46	164.6	122.2	118.22	104.09	46.21	220.32	119.21	61.63	74.6	143.19	216.52	145.76	132.86	110.36	68.07	102.99	37.01	150.02	158.92	177.28
PI 16_0-18_1	786.08	1582.86	1422.4	1651.85	1688.12	1104.04	1893.91	1215.62	655.25	1776.89	1528.72	1050.15	1138.28	1319.23	2089.26	1462.14	1272.47	1424.89	2029.31	1433.95	788.16	1247.49	2177.14	2180.71
PI 16_0-18_2	2213.16	2495.19	2581.12	2895.74	4061.69	2545.3	3824.5	2866.47	1421.47	2632.74	3150.87	1790.53	2243.43	4125.87	4767.58	2423.49	2470.34	1410.41	1358.13	1952.13	1251.71	1965.46	2614.71	3836.22
PI 16_0-20_1	6.54	4.26	16.45	9.85	7.26	12.92	10.84	11.97	3.43	2.4	4.94	9.17	20.05	10.72	7.62	12.68	3.71	3.48	21.24	12.42	6.28	16.77	13.23	23.46
PI 16_0-20_3	236.69	380.68	438.32	314	400.32	354.12	315.9	253.88	123.59	237.35	344.4	526.75	337.01	453.08	581.26	250.25	295.09	179.37	251.97	292.95	133.16	194.72	572.99	277.66
PI 16_0-20_4	665.46	1996.33	1179.71	1823.22	2363.11	1162.61	1088.89	2483.65	825.36	1324.54	3083.38	2642.14	1017.05	1236.89	2283.06	863.49	1140.45	964.27	1179.15	1067.22	613.53	1603.58	1569.07	1344.88
PI 16_1-18_0	93.15	147.75	126.49	61.44	245.7	149.27	131.23	150.08	88.08	115.07	234.97	190.83	131.97	285.77	282.07	87.63	83.6	144.08	139.01	124.28	80.29	106.9	238.89	131.12
PI 16_1-18_1	25.61	35.5	32.5	38.42	73.71	32.94	30.81	47.65	14.44	25.68	42.82	36.74	39.35	73.46	150.5	59.75	76.31	26.73	65.31	52.52	18.29	38.38	57.96	63.41
PI 16_1-18_2	0.08	16.07	14.46	13.88	14.41	8.54	19.1	11.25	5.58	5.67	15.57	21.6	10.62	15.95	47.06	20.19	4.85	5.3	3.14	6.09	6.64	3.87	16.64	8.68
PI 18_0-18_0	76.2	148.45	165.1	227.09	130.04	107.64	211.43	84.73	62.88	302.88	152.03	68.32	101.49	148.11	336.54	170.25	168.8	110.1	215.65	171.21	56.68	136.61	188.21	217.83
PI 18_0-18_1	1438.09	2024.84	1548.55	2744.66	1703.62	1235.66	2390.23	1366.39	634.93	1926.63	1628.44	816.41	1330.03	1547.61	2465.22	2237.31	1685.93	839.79	2058.54	1564.64	1229.13	1963.31	1931.49	1972.15
PI 18_0-18_2	4320.74	8736.56	9292.19	7730.06	5456.38	5583.52	13431.1	6634.03	3878.5	4630.96	5753.01	7800.91	6520.89	10468.8	8049.15	7316.66	4087.88	2662.97	6831.98	5466.87	3447.72	5198.34	5908.25	11620.9
PI 18_0-18_3	10.09	65.43	61.06	36.55	74.46	29.67	58.14	34.24	23.62	26.2	63.78	84.54	33.47	21.84	38.92	25.18	16.81	14.78	20.95	28.15	5.64	28.38	61.31	54.76
PI 18_0-20_2	237.65	268.87	350.54	594.55	287.91	187.19	294.57	179.33	222.54	226.02	253.54	339.94	342.35	310.11	384.02	364.94	324.08	210.43	319.44	195.71	163.71	275.82	374.96	390.09
PI 18_0-20_3	1924.73	3081.57	3433.58	3875.34	2992.99	1678.38	2754.82	2449.06	2163.33	2161.78	1950.27	3051.99	2225.54	2239.68	3226.54	2843.91	2014.29	2137.41	2335.47	1437.77	1189.52	1977.79	2771.94	2522.55
PI 18_0-20_4	6754.21	7671.09	7842.88	11071.5	9553.89	8378.34	7434.2	6881.72	8269.66	7742.56	11049.5	11906.4	9267.98	11456.6	8627.51	8593.05	8779.04	6640.83	10895.7	5501.48	6891.71	6292.55	10678.7	7668.92
PI 18_0-20_5	33.51	77.29	44.33	76.66	52.07	25.98	51.26	45.08	29.85	61.36	58.74	79.46	43.43	48.74	81.29	27.05	57.49	37.81	61.49	30.07	9.54	31.13	52.27	54.3
PI 18_0-22_4	67.97	117.75	123.46	129.89	100.86	85.36	78.69	57.26	70.36	70.84	93.11	115.62	81.11	94.7	117.93	76.8	69.54	94.15	125.96	64.31	40.91	90.13	107.43	77.84
PI 18_1-18_1	1075.58	1048.96	1510.96	2297.67	1043.8	1103.14	1217.18	346.8	437.13	1417.22	959.73	444.83	847.09	983.95	2882.08	1512.22	1379.14	743.95	1266.73	1052.94	706.25	724.66	2332.98	2021.98
PI 18_1-18_2	1142.17	1170.53	1542.74	1600.31	1042.87	620.38	1552.31	542.47	466.85	882.89	1063.59	820.28	818.05	871.55	1322.8	1647.23	892.59	467.44	625.77	843.68	439.91	714.37	1330.37	1521.71
PI 18_1-18_3	3.18	8.34	4.29	3.93	8.05	1.47	8.2	3.43	4.72	5.71	2.59	9.26	2.18	7.37	8.81	6.57	4.96	5.33	0.93	4	2.84	3.063	12.12	10.94
PI 18_1-20_3	105.51	80.3	139.57	153.85	187.8	93.47	89.4	74.63	54.59	86.69	86.26	106.76	71.62	103.17	311.6	89.12	106.78	54.32	88.61	88.3	49.17	80.88	102.47	109.73
PI 18_2-18_2	145.62	180.18	203.6	196.02	164.08	53.8	234.09	126.78	90.48	89.08	126.32	112.16	150.18	137.76	177.01	212.54	108.45	23.06	37.74	70.41	62.8	104.49	289.43	157.01
PI 18_2-20_1	4.49	7.25	4.91	25.71	8.51	12.32	25.22	1.79	9.2	4.06	7.62	12.76	8.19	7.54	9.99	12.94	2.44	3.42	2.26	3.81	4.8	53.4	6.38	14.22
PI 20_0-20_4	7.7	6.16	10.36	17.88	16.64	7.78	14.54	11.08	9.82	5.48	6.02	18.7	14.15	3.04	18.6	6.45	0.49	9.4	5.05	8.41	3.7	14.21	12.66	15.75
CE 14_0	1.06	1.62	2.35	1.02	2.04111	1.42	1.81	1.312	1.50889	1.571	0.97	1.59	1.86	0.97	1.49	3.08	1.92714	1.51111	1.93	1.38	1.11	1.73667	1.21	0.89
CE 16_0	7.03	3.85	7.71	4.26	2.63	8.39	5.3	4.58	8.57	12.87	2.44	7.32	2.75	8.33	3.01	8.98	9.37	12.88	8.73	8.66	7	3.99	2.53	7.23
CE 16_1	1.66	1.2375	3.19	1.59667	1.39	1.31	1.38	1.55	1.69	1.43	1.345	1.16	0.94	1.01	1.85	1.22	1.75143	1.68	1.15	0.97	1.58	1.7	1.27	2.12
CE 17_0	1.09	1.32	0.9	1.36	1.86	1.79	1.78	3.46	1.19	1.53	1.01	2.09	2.95	1.6	3.35	1.54	1.32	1.12	1.51	3.47	1.68	1.91	1.17	2.01
CE 18_0	7.09	4.17	1.39	6.81	0.99	5.19	8.51	3.95	9.63	3.72	4.52	2.36	1.77	6.24	1.98	4.83	3.04	4.83	11.02	3.36	8.19	2.44	4.35	8.2
CE 18_2	363.97	222.09	278.98	479.27	267.21	551.85	275.67	388.13	654.18	245.34	227.97	450.04	295.23	284.35	160.16	438.15	144.45	542.53	398.45	266.88	742.95	424.53	188.09	352.14
CE 20_0	1.72	1.4	2.48	2.01	2.09	1.5	4.12	2.32	1.2	3.99	2.34	1.67	3.01	1.41	2.95	1.99333	0.94	1.99	4.33	1.98	1.942	1.72	1.1	2.86
CE 20_2	1.58	1.32	1.4	1.55	1.53	1.65	2.51	1.65	1.66	1.86	1.35143	1.6	2.36	1.47	1.11	1.42	2.09286	2.6	1.69	1.23	1.28	1.38	1.39	1.58
CE 22_0	1.44	1.09	1.6075	1.45778	1.86875	0.92	1.4675	0.95	1.05	1.07	0.96	1.54889	0.92	1.14	1.03	1.26	1.26	1.50875	2.49	1.813	1.39	1.29	1.37125	1.16
Cer d18_1-16_1	663.93	940.64	757.09	1006.14	722.36	930.47	890.62	658.36	778.21	912.32	998.38	661.81	520.31	912.88	765.62	625.59	278.61	640.1	555	449.03	691	734.52	757.67	601.28
Cer d18_1-18_1	23.59	47.89	45.85	47.69	40.52	62.37	10.39	28.52	25.03	57.46	74.37	12.7	29.41	60	63.62	43.71	2.09	56.92	29.38	4.79	29.9	49.34	83.7	18.83
Cer d18_1-20_1	19.69	33.49	40.3	30.49	26.74	31.34	7.5	18	21.79	34.86	54.62	29.6133	14.86	26.48	52.01	35.08	1.54	53.89	3.28	32.046	2.57	42.86	63.91	26.38
Cer d18_1-20_4	914.14	1018.72	708.65	1028.31	791.87	781.52	1179.34	997.09	1036.3	940.71	972.33	682.45	186.19	271.14	260.26	223.65	198.09	176.3	256.31	257.79	299.12	236.69	349.71	145.18
Cer d18_1-22_0	1441.68	1618.55	1235.63	1768.4	1321.87	1292.32	1854.07	1684.32	1659.83	1617.13	1514.62	1052.73	368.42	388.5	344.08	516.37	312.44	363.47	359.64	395.92	421.76	316.63	492.75	325.28
Cer d18_1-22_1	233.78	449.32	358.75	536.69	357.21	359.01	262.31	219.28	266.68	457.16	607.04	219.36	308.23	427.34	507.33	476.71	144.28	339.24	202.33	250.2	425.11	447.07	710.79	322.68
Cer d18_1-22_2	2544.13	2797.96	2338.3	2220.44	2345.94	2673.73	2742.75	3150.65	2852	2619.7	3444.98	2320.73	339	301.08	102.46	207.84	237.38	1422.71	1356.05	192.06	301.68	222.54	382.91	241.56
Cer d18_1-22_3	70.69	154.22	159.36	138.6	125.38	135.9	67.25	79.02	114.41	148.72	192.96	109.24	114.5	173.07	199.78	143.69	50.47	122.47	60.88	108.53	121.19	139.99	250.09	113.92
Cer d18_1-22_5	596	778.66	713.22	564.15	550.26	617.54	1438.56	731.54	1042.7	771.55	616.46	554.72	319.361	25.56	43.83	346.864	56.61	437.159	135.54	424.141	64.11	376.073	91.76	63.58
Cer d18_1-22_6	49.79	64.68	44.83	48.25	47.79	65.03	62.27	89.97	104.88	69.92	69.64	58.98	35.62	42.5911	43.954	31.9537	25.97	14.77	34.6544	12.28	13.18	34.9622	4.39	46.2322
DAG 12_0-16_0	2.0325	2.48	3.99	1.11	1.22	1.43	1.653	1.55	3.83	1.02	3.09	0.93	3.78	1.29	1.39875	1.34	4.23	0.89	1.9	1.33	1.73	1.01	1.4	1.50667
DAG 12_0-18_2	2.32	0.91	5.04	4.51	5.49	1.03	4.72	2.5	3.31	3.79	2.5	2.67	1.75	1.52	2.19	1.86	1.72	1.84	3.81	1.33	5.33	4.67	3.52	3.11
DAG 12_0-18_3	23.07	8.65	9.37	45.86	15.95	13.29	9.93	22.84	34.78	11.54	11.96	33.17	11.67	24.63	6.38	8.64	10.29	11	9.46	9.62	17.16	28.82	13.59	11.92
DAG 14_0-16_0	23.51	6.26	7.75	13.48	5.42	13.75	15.52	9.41	9.35	12.04	10.96	7.92	3.44	10.56	7.62	5.5	3.79	5.15	13.54	8.44	4.33	7.13	3.55	11.85
DAG 14_0-18_0	10.62	11.84	8.82	12.18	4.84	3.88	6.47	7.71	8.97	7.4	8.89	10.48	8.91	6.72	3.21	9.36	10.51	10.99	10.71	9.09	19.54	5.66	4.54	5.75
DAG 14_0-18_1	8.91	5.53	7.23	4.5	2.81	7.31	5.85	10.9	7.69	6.04	13.32	10.68	7.28	6.55	5.62	4.28	5.39	6.17	2.44	8.98	10.48	8.76	5	7.94
DAG 14_0-18_2	2.98	1.3075	2.26	5.94	3.17	2.69	1.648	1.58667	4.09	2.12	1.55	1.46	1.86857	1.44125	0.94	3.68	2.66	2.57	1.85	1.55	1.46	3.12	1.87	1.29
DAG 14_1-18_1	72.75	45.25	32.81	39.79	43.5	51.45	66.95	80.39	70.59	33.09	23.03	69.27	21.87	19.67	17.87	17.1	15.12	43.17	24.49	8.82	29.47	5.97	12.07	6.33
DAG 14_1-22_4	9.37	8.98	16.08	9.72	12.67	26.77	22.79	12.67	17.06	7.47	32.07	35.02	4.42	8.61	13.31	5.07	5.52	8.38	16.72	8.18	9.08	14.41	15.44	8.69
DAG 14_1-22_5	6.45	1.5	5.74	2.14	3.35	1.1	2.51	4.96	4.43	1.92	1.05	3.4	2.04	2.72	1.48	2.27	3.01	2.24	2.38	1.67	3.22	2.27	8.25	2.17
DAG 14_1-22_6	2.8	1.08	0.9	2.31	2.01	1.26	1.95	1.08	1.5	1.44	1.47571	1.72	1.49625	1	1.09	3.14	1.96125	0.99	1	2.01	2.29	1.51	1.81	1.96
DAG 16_0-16_0	682.27	342.92	363.98	368.99	263.4	340.62	469.05	424.31	865.28	406.22	312.9	369.78	415.18	256.07	179.45	426.41	606.63	717.88	372.73	280.44	545.43	336.58	155.13	460.82
DAG 16_0-16_1	12.62	17.53	7.78	5.69	7.95	13.17	10.54	11.42	12.64	9.16	8.66	9.63	12.06	15.91	18.31	11.82	20.29	5.92	18.34	17.6	15.54	10.45	12.86	15.95
DAG 16_0-18_0	723.51	524.09	413.95	408.14	280.95	466.61	557.29	654.01	988.23	516.62	365.7	500.39	323.51	425.56	210.41	527.39	820.53	777.81	459.38	436.54	664.29	368.54	208.6	442.77
DAG 16_0-18_1	17.81	18.46	18.48	8.53	10.72	10.16	13.19	18.19	14.23	19.2	21.72	14.7	20.35	9.36	9.9	9.62	15	15.44	10.31	16.3	16.49	10.08	12.24	7.64
DAG 16_0-18_2	15.29	16.02	15.78	12.63	26.64	10.02	17.52	9.33	16.52	12.95	19.55	16.31	21.85	14.48	21.28	10.32	13.28	22.17	14.01	13.98	12.49	13.73	15.15	18.48
DAG 16_0-20_1	1.88	1.47	1.47	2.89	1.2	1.71	1.35	2.65	2.88	4.21	1.64	1.18	3.39	1.31125	1.62222	1.64	2.01	1.56667	1.44	2.02	2.25	1.9	1.38875	1.66
DAG 16_0-20_4	3.36	4.75	4.94	3.69	10.95	6.48	3.14	9.31	5.46	3.56	8.76	4.35	7.18	4.23	6.14	1.35	7.1	6.88	4.84	14.85	9.14	9.47	5.21	10
DAG 16_1-16_1	4.33	2.97	1.8	1.52	0.9	0.95	0.98	1.26	1.6925	1.8	1.98	0.97	1.14	1.55	2.93	1.2	1.22	4.16	2.1	2.12	1.29	2.89	1.04	2.55
DAG 16_1-18_0	2.13	1.3	1	2.39	1.775	1.72	2.8	2.42	1.5	0.97	1.59	2.5	1.02	2.32	2.94	1.12	3.51	4.22	1.59	3.1	2.08	1.22	1.57	2.48
DAG 16_1-18_1	7.05	3.1	12.81	1.17	4.54	6.13	2.57	8.94	2	2.87	3.88	1.22	3.19	2.69	5.64	4.49	1.85	1.29	2.48	3.04	6.22	1.86	1.93	2.49
DAG 16_1-18_2	8.81	7.34	3.56	4.37	8.15	1.83	7.29	2.99	5.74	3.1	5.66	7.23	8.58	6.57	9.82	5.35	8.81	6.1	5.69	5.29	2.7	2.78	4.86	2.5
DAG 18_0-18_0	411.19	520.25	420.42	444.34	180.61	526.91	670.4	733.06	1053.87	499.83	289.32	478.77	184.76	329.46	137.69	527.05	563.88	283	253.22	306.51	377.73	351.43	139.19	279.99
DAG 18_0-18_1	2.26	7.24	4.39	8.85	3.12	6.09	1.72	2.36	7.42	2.91	7.32	3.4	2.53	4.07	3.28	2.71	6.45	4.66	6.69	2.94	4.74	3.46	5.03	8.36
DAG 18_0-18_2	11.17	5.5	9.39	7.69	5.19	8.25	7.56	4.69	5.63	2.41	12.11	8.05	9.86	8.46	7.21	9.42	8.55	6.34	9.33	7.53	6.25	4.11	5.72	5.49
DAG 18_0-20_0	6.4	5.35	9.89	8.89	4.07	2.95	11.32	12.76	6.75	7.89	6.65	3.71	5.63	3.99	5.9	9.31	5.07	3.48	7.42	9.73	6.07	6.32	4.5	4.39
DAG 18_0-20_1	1.24	1.87	1.25	2.98	2.54	1.12	1.44	1.19	1.01	1.61	2.44	2.03	1.56222	1.41	1.622	1.17	2.2	1.43	1.49	3.44	1.05	1.4	0.96	0.9
DAG 18_1-18_1	36.84	62.91	61.07	68.01	57.28	52.25	56.56	37.06	47.03	47.56	91.97	60.93	48.3	59.66	72.5	48.26	47.15	28.82	71.03	62.96	19.18	70.22	47.88	26.73
DAG 18_1-18_2	75.17	74.35	75.54	63.47	64.76	33.28	82.77	52.34	66.06	57.04	113.12	55.39	61.48	53.8	69.17	45.82	61.04	65.49	39.95	78.14	64.42	31.73	52.81	73.72
DAG 18_1-18_3	13.7	4.75	11	12.55	20.22	9.64	6.29	3.59	5.67	10.87	7.03	8.54	2.61	12.78	12.16	5.32	8.68	4.93	4.65	8.61	5.9	6.3	5.41	6.2
DAG 18_1-20_0	1.92143	1.01	1.01	2.37	1.87	0.91	1.21	1.79	1.9	2.07	1.38714	1.47778	2.54	1.12	1.16	1.57	2.41	1.25	1.54	1.82	1.04	0.98	1.44375	1.609
DAG 18_1-20_1	2.11571	0.92	1.46	0.98	1.54	1.16556	1.36	1.19	1.86	1.42	1.12	1.42	1.53667	1.89	1.45	1.96	3.16	1.97	1.68778	1.15	1.87	3.1	1.47	1.53
DAG 18_2-18_2	83.02	70.18	130.75	90.15	95.03	36.94	141.45	53.16	55.11	39.65	188.75	66.69	86.62	123.13	75.95	69.3	56.34	22.08	69.24	89.09	26.99	39.14	76.66	67.07
DAG 18_2-20_0	3.23	1.13222	1.70333	1.66	3.38	0.98	1.25	1.1	1.50889	1.6	1.18	1.17	1.37	2.21	1.02	1.96	2.01	1.1	1.68778	1.43	1.5	1.32	1.61	1.8
DAG 18_2-20_1	1.17	1.3	1.63	3.42	2.82	1.48	1.16	2.87	4.26	2.43	3.75	0.91	1.28	1.57	2.56	3.9	4.16	2.11	1.39	1.934	1.69	4.02	2.71	3.51
DAG 18_2-20_2	1.67	1.28	2.08	1.19	2.83	1.1	1.65333	1.33	0.91	1.68	1.84	3.87	0.99	2.37	1.59	2.64	1.04	0.95	1.3	1.8	2.55	1.73	1.08	2.14
DAG 20_0-22_1	2.81	0.88	1.48	1.17	2.72	1.16556	2.27	1	2.01	1.55	1.39	1.85	1.88	1.48	2.02	2.18	2.42	1.85	1.68	1.04	3.65	2.62	1.45875	1.12
DAG 20_0-22_6	27.34	13.08	18.66	16.24	26.03	33.15	20.72	43.23	48.15	16.62	21.97	27.2	16.27	21.21	8.14	39.18	17.84	47.18	33.34	26.7	68.45	22.03	10.15	39.76
DAG 22_0-22_2	1.89143	0.99	1.46	1.47	1.1	0.94	1.06	1.48	1	1.59	1.4	1.43	0.97	1.62	1.08	1.13	1.19	1.21	2.41	2.84	1.69	1.60111	1.83	2.49
HexCer d18_1-12_0	24.47	81.19	80.3	61.28	63.28	76.73	17.11	34.6	48.81	59.79	120.42	32.76	49.87	77.72	99.11	57.56	19.96	66.11	22.64	63.41	37.07	55.92	120.18	45.78
HexCer d18_1-14_0	21.17	28.15	39.98	41.7	34.48	41.35	39.04	55.47	17.94	40.66	36.93	46.49	20.58	58.06	39.87	16.83	15.46	33.22	30.78	73.24	27.77	27.37	56.46	33.42
HexCer d18_1-16_1	1081.44	2162.07	1606.95	2057.34	1192.11	1567.4	2316.12	1397.5	1759.15	1191.77	2091.03	1625.35	904.15	1482.57	1082.12	976.09	435.96	682.41	1118.09	626.52	1002.44	1053.17	867.2	1080.16
HexCer d18_1-18_0	633.13	538.09	403.69	783.15	498.07	483.3	966.3	831.61	848.79	728.37	562.32	503.63	42.38	369.535	50.29	379.333	354.387	444.998	130.62	373.18	86.58	82.97	326.637	352.963
HexCer d18_1-20_0	838.32	745.42	514.68	998.31	722.7	738.96	1277.35	926.82	1082.98	891.41	622.48	446.88	872.18	787.93	489.14	862.07	229.37	704.14	913.67	997.16	751.48	754.48	797.89	363.44
HexCer d18_1-20_1	3.82	4.14	16.4	9.23	4.31	3.971	4.606	5.56667	25.23	4.16	6.85	4.903	3.50667	5.009	2.04	5.19556	5.3825	5.79556	1.49	0.25	7.013	7.6	4.185	1.99
HexCer d18_1-20_2	223.35	243.62	187.63	202.16	183.32	172.29	375.32	284.56	240.49	220.81	236.59	127.73	147.27	126.11	132.31	112.49	48.61	133.02	146.75	123.98	141.95	104.97	144.14	76.37
HexCer d18_1-22_0	8577.6	10754.3	6436.1	9137.32	7595.29	7046.9	9114	10398.5	9939.93	9248.65	9755.28	6397.47	7209.11	7183.36	5677.88	7118.04	2553.08	6538.37	6403.64	7730.65	6683.8	6084.77	8058.37	5402.26
HexCer d18_1-22_1	629.64	799.55	671.04	631.74	636.28	627.38	1158.05	735.82	841.11	748.27	796.21	616.79	468.39	550.06	352.3	306.17	209.85	478.54	626.09	452.74	428.31	731.17	549.43	430.02
HexCer d18_1-22_3	60.98	84.04	72.73	64.22	92.85	76.79	103.93	81.28	113.67	78.04	96.11	77.88	4.59	20.52	14.04	34.6362	8.33	31.14	17.51	15.64	8.77	12.39	14.76	11.75
LPC 15_0	161.05	220.09	264.59	221.08	326.09	222.64	176.01	172.18	122.74	232.85	185.08	190.47	219.29	316.93	292.59	176.35	101.61	149.41	190.62	181.1	148.85	169.2	205.75	136.34
LPC 16_0	2170.93	2362.83	2386.35	2250.53	2272.47	2023.91	2302.08	2226.38	2199.9	2238.87	2280.43	2134.54	2376.69	2502.75	2556.61	2258.87	1567.47	2131.45	2356.42	2338.28	2138.05	2303.37	2111.21	2211.02
LPC 16_1	522.56	552.8	682.05	503.31	875.04	646.23	529.63	790.57	543.06	671.98	718.1	716.09	529.05	681.22	1043.7	483.22	341.87	593.01	567.03	846.51	467.44	581.7	516.21	432.12
LPC 18_0	365.22	544.64	607.69	596.51	601.48	429.83	594.53	390.56	439.96	512.81	535.66	499.71	449.77	585.52	771.9	392.71	169.11	334.4	484.19	514.84	440.4	404	449.6	436.64
LPC 18_1	237.9	298.45	295.49	286.73	389.44	278.15	292.87	328.42	239.82	335.67	244.89	282.88	256.27	339.64	534.31	260.77	161.79	260.26	348.6	587.12	416.06	311.63	232.46	290.79
LPC 18_2	964.73	1065.38	1136.41	1006.61	1207.38	1034.09	965.29	974.07	994.24	1155.77	902.17	885.14	969.67	1175.17	1582.04	1157.12	763.67	855.67	1002.26	1520.19	1496.17	1014.95	1071.42	933.13
LPC 18_3	243.19	274.75	305.65	175.06	433.87	332.31	280.79	421.3	200.67	320.03	240.63	240.24	235.42	208.7	559.95	186.58	149.92	178.17	149.25	407.44	240.43	216.42	267.43	220
LPC 20_0	67.49	81.39	79.59	131.78	90.92	61.46	135.04	90.84	75.75	81.93	67.16	73.16	63.25	58.57	85.74	75.62	23.25	43.31	67.27	69.6	62.41	74.57	54.36	86.82
LPC 20_3	687.11	874.1	1018.14	799.97	1642.6	938.78	655.33	1213.42	793.02	874.9	1022.17	989.48	811.09	1023.72	1730.76	627.71	567.21	1012.01	838.33	1735.98	1144.21	891.62	856	644.84
LPC 20_4	1187.04	1510.88	1467.83	1061.12	1924.68	1643.29	1089.68	1895.32	1497.03	1416.77	1713.5	1730.17	1185.51	1622.6	1902.96	914.99	822.71	1463	1090.72	2207.24	1978.37	1315.17	1517.79	1437.43
LPC 20_5	56.56	97.96	99.62	48.53	143.71	129.2	43.32	184.78	50.39	107.44	165.07	118.67	85.22	111.6	179.75	35.11	56.67	93.89	93.71	216.79	86.85	95.71	174.77	77.25
LPC 22_1	96.27	77.91	74.16	116.08	91.2	140.56	51.39	61.37	47.39	66.04	61.9	64.91	72.99	112.17	155.78	102.38	69.35	69.3	87.99	117.28	135.05	56.19	114.84	78.02
LPC 22_4	60.78	70.68	81.31	52.92	143.19	83.19	74.66	106.51	69.15	65.64	77.56	105.94	58.97	85.43	118.61	45.94	46.74	85.02	74.64	129.49	92.15	57.34	66.68	74.1
LPC 22_6	365.84	413.65	478.12	260.62	627.23	475.08	516.35	552.93	574.86	377.5	468.56	528.49	343.76	359.24	706.83	214.89	268.81	402.49	394.32	815.23	600.94	340.97	311.29	347.78
LPC 24_0	43.41	49.82	39.91	74.74	64.86	43.21	65.85	59.61	42.4	54.47	44.52	56.41	49.13	39.54	46.83	46.04	22.16	43.32	31.68	44.22	43.48	43.2	43.43	63.36
LPC O-16_0	161.8	223.53	273.26	225.83	316.88	212.11	183.47	173.56	131.22	213.21	196.87	194.93	215.85	319.31	289.18	179.29	91.15	182.05	192.03	177.87	133.74	175.62	203.83	154.46
LPC O-18_0	246.03	340.01	403.34	419.39	417.3	325.22	301.94	215.36	263.06	314.91	296.71	273.07	304.18	484.91	426.63	260.39	150.7	278.35	335.8	261.36	295.72	265.09	275.66	280.47
LPC P-18_1	3.69	3.93	4.21	2.14	5.89	2.98	4.45	3.69	2.13	3.86	3.55	2	3.71	4.13	6.63	3.5	1.08	2.37	4.5	4.43	3.31	3.14	2.17	2.29
LPC P-20_0	9.48	17.25	18.2	14.14	21.25	17.97	19.79	15.38	15.78	17.47	14.67	12.99	9.27	24.54	29.56	15.46	7.58	15.11	22.61	26.17	19.16	16.28	12.41	15.35
LPE 12_0	0.74	1.0175	0.12	0.5	0.91	0.99	1.08	0.9975	0.61	0.69	0.86	0.26	1.27	0.41	0.66	1.39429	0.91	1.57833	1.46125	0.31	1.21429	1.51429	1.23429	0.13
LPE 16_0	83.27	133.62	108.33	91.16	152.78	86.95	126.19	143.3	97.29	137.89	71.34	117.08	92.72	122.69	140.41	71.6	68.38	77.05	121.84	164.61	72.04	96.42	79.42	91.54
LPE 17_1	1.60857	1.27714	1.40429	0.03	0.57	1.77	0.28	0.56	0.02	1.43	0.982857	0.25	0.25	0.07	1.33889	1.54125	0.03	0.59	0.34	1.44333	1.35286	1.60571	0.47	1.187
LPE 18_1	1.65	3.78	3.12	2.11	4.67	2.26	2.36	1.49	1.18	2.71	1.66	2.36	3.92	5.71	11.66	2.05	4.58	3.31	3.78	5.61	4.68	4.86	5.79	4.9
LPE 18_2	1.24167	0.16	0.01	0.95375	0.15	1.26286	0.36	0.09	0.65	0.44	0.08	0.48	0.04	1.13	1.13222	1.35286	1.17857	1.55571	0.7	0.14	1.46	0.58	1.31375	0.42
LPE 20_0	1.07	2.81	3.36	4	3.76	0.9	4.23	3.27	2.37	2.44	2.44	3.29	2.24	2.3	4	3.23	3.08	2.6	3.53	5.78	4.18	2.81	3.22	4.69
LPE 20_1	3.15	4.38	7.78	6.17	10.36	7.39	12.04	6.66	7.84	10.58	7.53	6.88	8.81	11.38	23.32	8.59	6.89	11.33	15.52	23.39	18.64	14.52	13.85	17.45
LPE 20_2	9.33333	7.7	8.29	7.46	11.19	3.67	11.11	9.16	6.26	6.62	6.02	10.77	6.27	8.18	7.19	8.21	4.02	7.19	8.49	22.66	11.19	6.57	11.04	11.4
LPE 20_3	43.807	40.58	51.42	37.46	110.92	48.46	37.85	72.07	47.95	48.07	48.91	67.05	36.23	67.57	83.69	37.19	46.78	64.54	58.65	102.77	53.4	54.77	62.54	41.42
LPE 20_4	236.486	240.9	217.62	173.88	291.11	237.64	231.03	285.13	294.42	250.9	209.94	330.67	199.87	268.68	305.47	170.02	202.64	288.3	250.6	461.46	348.96	262.79	330.95	344.52
LPE 20_5	10.4256	12.48	9.59	6.12	12.24	11.89	10	11.87	6.71	14.93	10.61	8.11	5.63	7.22	11.86	3.24	9.01	7.41	13.06	19.62	3.56	7.64	15.01	9.51
LPE 22_0	3.17	3.15	3.23	3.96	3.23	2.65	4.84	3.68	2.75	4.02	3.33	4.3	3.4	4.17	3.01	3.48	1.46	2.46	4.92	3.89	2.89	4.34	2.55	5.89
LPE 22_1	0.33	1.03	1.42714	0.41	0.21	1.28571	1.23	0.27	0.72	0.37	1.38	0.07	1.31	0.57	0.04	0.17	0.44	1.65	0.59	0.31	0.8	2.34	0.65	0.01
LPE 22_3	0.34	1.07571	1.34714	0.38	0.31	1.34875	1.2825	1.25125	0.03	0.54	0.11	0.83	1.18	2.12	1.88	1.13	1.26	1.85	1.42333	2.91	0.71	0.93	1.62	0.14
LPE 22_4	14.9	17.53	15.02	7.84	30.63	21.13	21.58	26.86	16.78	19.31	20.81	28.75	17.5	18.31	30.33	12.99	14.24	21.49	16.07	42.63	25.56	16.7	27.28	26.29
LPE 22_5	33.89	24.61	21.84	15.9	67.87	47.53	54.49	52.32	37.27	21.08	37.12	55.4522	40.74	45.6	74.22	25.53	28.52	58.63	45.33	85.41	26.52	42.53	52.51	58.55
LPE 22_6	113.87	166.87	139.32	81.53	210.76	179.09	170.99	216.11	168.59	136.66	115.09	176.6	112.76	149.84	156.38	83.22	72.36	168.41	163.83	242.78	182.79	142.04	150.28	186.1
MAG 16_0	924.83	1517.2	828.09	613.41	517.09	816.4	1086.04	2256.3	864.91	785.26	929.09	867.29	528.43	582.94	630.19	468.43	1045.18	570.6	645.53	436.08	505.83	530.61	471.91	590.48
MAG 16_1	11.01	6.68	5.97	14.55	4.16	6.34	11.36	6	6.19	6.73	4.38	7.77	8.58	6.63	11.18	3.28	6.67	7.73	13.91	6.42	3.03	3.96	1.72	7.14
MAG 18_0	890.84	550.43	636.21	712.96	669.22	509.52	961.02	590.77	760.48	597.81	635.24	567.93	691.61	493.84	508.84	541.25	1070	732.22	692.72	587.66	667.28	656.61	429.53	750.84
MAG 18_1	37.01	20.64	28.02	24.72	26.18	29.38	34.35	19.14	15.75	26.07	34.61	34.44	26.65	19.92	23.52	29.77	27.2	31.61	32.41	25.27	30.04	30.24	29.43	28.77
MAG 18_2	8.44	2.15	12.16	7.61	15.91	8.01	11.07	7.03	3.7	4.51	10.42	22.42	31.69	24.61	20.89	10.92	23.01	19.56	24.8	13.67	5.89	9.11	14.52	29.05
MAG 20_4	2.41875	1.16	3.99	6.14	3.99	4.32	4.66	2.49	5.7	4.85	2.184	1.77	2.28	1.84	1.9	12.45	2.93	8.92	1.48	3.39	6.38	2.44	2.39	3.88
MAG 22_5	75.3	96.01	60.98	77.42	52.52	47.737	102.19	93.75	75.53	57.58	74.8	75.13	60.53	46.3	49.06	44.9888	29.524	68.23	44.51	46.79	55.94	48.15	52.13	62.12
PC 16_0e-16_0	2967.23	2798.52	2683.14	2889.09	3090.88	3401.57	2997.9	2907.95	2930.44	2914.85	2828.84	2385.64	5226.33	5855.07	4829.27	5195.05	3300.06	6189.61	4700.1	5875.79	5101.16	4384.08	5715.89	4000.97
PC 16_0e-16_1	1973.92	1799.28	1480.27	1918.53	1966.24	2354.23	2517.69	2076.15	2487.08	2032.77	1965.16	1682.4	2330.98	2751.67	2160.26	2707.44	2214.83	3099.78	2746.24	3003.1	3800.08	2645.35	2548.93	1984.14
PC 16_0e-18_0	1112.68	1524.13	1303.07	1768.66	1866.91	2246.71	1322.39	1482.67	1637.07	1615.83	1486	1451.48	1595.73	2094.28	1623.53	1401.54	1037.2	2336.46	1443.85	1985.67	1967.65	1366.28	1859.11	1458.51
PC 16_0e-18_1	6175.18	5155.67	5147.37	5961.13	7833.8	8210.77	6476.5	7384.51	5802.47	6572.83	5740.73	5717.57	7583.69	8840.82	6727.29	7736.56	5224.72	8790.07	7337.41	8816.65	7508.65	6562.09	7612.62	6068.1
PC 16_0e-18_2	10328.5	9715.99	8423.63	9856.44	11507.8	11373.1	10741.7	9847.71	10104.8	11372.3	11229.6	7869.97	5758.98	8417.32	4057.6	6745.51	3067.96	4897.68	6872.45	4593.84	4979.08	4429.16	6714.41	4407.2
PC 16_0e-20_1	1915.47	1919.74	2046.93	2728.55	3262.51	3243.39	2159.6	1964.05	2034.19	2328.6	2014.22	2126.17	1835.62	2565.63	1681.11	1889.5	1764.85	2642.71	2669.33	2193.68	2333.27	2013.64	1823.76	1731.6
PC 16_0e-20_2	5435.37	5429.01	5438.92	8825.7	6214.84	8444.15	6424.54	5726.69	5853.19	7454.01	5421.54	5090.22	7031.41	7099.9	4350.65	7062.67	5113.14	7713.39	6069.37	5462.36	8503.71	4682.17	7354.54	7022.11
PC 16_0e-20_4	15808.9	15065.8	12034.5	18328.5	16053.3	16800.9	15545.3	15166.3	16358	17945.8	18590	14207.2	11698.8	8564.73	7044.09	7178.3	10475.5	15285.9	14481.2	14424.5	20570.1	13561.3	14728.6	13225.5
PC 16_0e-22_5	18814.5	21330	17899	21735.1	22020.1	20530.1	21802.2	21896.3	23223.5	21793.1	22015.5	20786.6	20068.1	24822.9	19969.7	23278.2	14531.8	31084.5	21354	27411.3	35171.5	21877	24033.6	21407.4
PC 16_0e-22_6	6369.31	7655.15	6558.41	7992.29	9266.01	8311.22	7846.2	7164.79	8542.51	8326.37	8847.13	7052.19	12918.1	12165.3	11644.6	11939.1	5971.95	15304.4	10963.4	11928.2	17458.2	8239.41	12207.8	9813.79
PC 16_0p-16_1	320.37	306.43	252.35	191.12	338.8	369.96	201.87	290.15	355.91	348.7	235.69	323.07	243.15	405.12	185.47	400.87	215.86	447.87	515.68	311.98	394.56	328.28	268.33	209.14
PC 16_0p-18_0	5786.56	4504.93	4809.59	5690.2	7128.69	7760.54	5793.03	5965.51	5649.5	5438.22	5876.03	5429.67	6905.73	8172.09	6266.6	7055.53	4846.84	8684.94	7113.09	8575.32	7636.16	6156.72	7399.86	5972.67
PC 16_0p-18_1	9890.21	9731.37	7743.26	11936.5	11209.1	12011.4	11453.5	10883.4	10110.3	12820.3	11785.7	8223.19	11442.9	14725.2	9413.72	14987.6	6924.03	9360.97	11890.3	11652.8	13089.9	10944.1	13043.1	9162.59
PC 16_0p-18_3	129.52	124.06	103.59	134.18	105.06	162.68	117.52	100.46	116.02	180.93	118.86	144.77	213.6	136.26	73.96	167.26	108.66	150.03	325.45	124.25	246.49	130.72	174.52	175.05
PC 16_0p-20_0	1839.27	2005.74	2181.59	2634.95	3007.87	3095.57	2102.29	1925.76	2290.97	2354.13	2069	2075.49	1789.96	2768.63	1627.45	2054.9	1790.08	2431.94	2690.84	2105.21	2634.12	1747.27	2007.77	1840.87
PC 16_0p-20_1	5817.87	6239.85	4841	8780.85	6815.26	8487.55	5805.01	4967.11	5556.53	6362.9	5896.34	6180.42	6075.84	7167.68	5662.23	7362.33	5091.14	6391.75	6997.81	4766.81	7336.08	4646.89	8049.14	6983.78
PC 16_0p-20_2	6329.64	6236.27	4668.57	8306.73	6567.41	7504.66	7313.43	6359.34	7154.27	8476.71	7484.12	5194.39	5848.52	6088	3654.03	6999.59	3794.03	5699.18	5696.51	4857.98	7128.99	5001.62	6354.1	5047.52
PC 16_0p-20_4	8850.53	17592.8	13165.5	16127.8	13236.4	15804.1	14187.1	14510.5	15764.2	19729.8	19139.1	15291.3	28295.1	20959.7	16716.8	17494.9	14577.9	27663	15425.1	18727.8	33377	25797.4	26393.9	23921.8
PC 16_0p-22_6	1351.89	2420.86	2175.48	2605.65	2851.34	2706.73	2764.32	1860.54	2844.88	3273.29	1996.95	2249.02	471.35	411.71	414.79	325.03	350.12	500.57	349.4	679.48	484.96	123.93	617.7	153.56
PC 18_0e-16_0	1336.28	1378.77	1292.98	1551.35	1832.1	2494.45	1328.67	1423.49	1520.51	1656.8	1308.4	1425.41	1580.63	2071.59	1501.49	1436.57	1116.13	2323.37	1570.68	2124.1	1979.12	1389.42	1591.62	1207.56
PC 18_0e-16_1	6119.32	5769.19	5589.17	6731.61	8368.14	8210.38	6571.73	7535.83	5868.36	6481.18	5929.89	5938.17	7688.22	8006.45	6267.9	7806.89	5200.43	8450.54	7561.95	9319.23	8019.25	6607.22	7908.52	5794.47
PC 18_0e-18_0	235.7	249.83	288.44	296.95	403.75	454.17	204.38	210.73	286.71	257.27	281.59	282.69	223.9	356.3	225.23	182.87	64.57	357.08	243.62	204.39	250.07	227.99	177.66	198.61
PC 18_0e-18_1	1681.8	1755.68	2103.78	2575.45	2366.12	2891.58	1904.18	1939.87	2086.13	2163.06	1908.34	1968.22	1880.88	2493.98	1740.93	1818.47	1585.58	2306.98	2123.62	1760.34	2275.38	1797.86	1867.6	1966.21
PC 18_0e-18_2	6043.23	5426.09	5296.18	8726.28	5877.3	7525.41	6059.28	5775.64	5853.29	6992.71	5761.3	5394.43	7173.11	7363.67	5438.68	6775.24	4952.87	6438.6	6189.19	5346.5	8209.22	5635.55	6207.11	6021.23
PC 18_0e-18_3	7455.44	7212.4	5612.6	9172.26	7373.16	7816.59	8331.71	7352.13	7446.61	9091.54	7556.12	6040.73	6571.36	6605.83	3559.43	7071.98	4474.51	6065.07	6128.89	5686.85	7345.69	4933.13	6451.48	5053.03
PC 18_0e-20_4	12204.3	14615.6	11164.1	14902.7	13224.9	16419.8	9370.47	14161.1	16335.7	15274.8	13712.3	12183.8	13965.7	16757.5	12394.1	14598.6	9431.1	19918	10462.6	17213.3	19718	13751.8	14768.7	13480.2
PC 18_0p-14_0	3864.1	3736.27	3080.76	3952.67	4359.48	4662.39	4772.69	4328.32	5131.28	4170.88	4169.82	3726.1	5513.92	6441.92	3993.22	4624.87	4743.7	6551.19	4605.31	6505.59	7379.33	5494.92	4653.13	4063.8
PC 18_0p-14_1	276.58	236.66	177.71	244.04	283.71	347.95	343.52	326.23	420.5	397.69	247.02	310.52	304.2	408.37	285.4	323.77	331.22	301.62	679.69	318.76	417.37	290.74	346.26	247.83
PC 18_0p-16_0	5930.26	5982.87	5410.24	7254.11	8468.77	8811	6763.77	6826.44	7431.01	6774.85	6470.79	5999.18	7544.65	8596.16	6616.87	7720.52	4446.58	8979.73	7567.94	9631.75	8090.83	6521.4	7548.84	5991.71
PC 18_0p-16_1	9455.51	8956.76	8411.23	13024.2	11563.3	12478.2	10887.2	10415.2	10428.1	10956.7	11255.5	8442.85	11664.1	15019.6	8555.63	14040.2	7523.23	10488.6	11992.3	11219.3	13039.7	10817	11489.4	10425.4
PC 18_0p-18_0	1861.9	1989.69	2212.61	2913.51	2955.77	3410.37	2068	1898.04	2038.25	2435.9	1975.04	1973.21	1815.87	2308.26	1864.96	2201.6	1829.73	2883.55	2770.28	2179.01	2331.65	1643.81	1913.9	1797.55
PC 18_0p-18_1	5532.31	5462.8	5831.84	7460.53	6204.82	8972.81	6252.26	6210.15	5620.12	7154.94	5915.91	6190.95	5794.1	7640.56	4015.73	6515.69	5140.44	6059.98	6964.79	4345.51	6985.72	4891.44	8538.21	4788.68
PC 18_0p-18_2	7164.44	7389.4	5388.97	9302.29	7431.04	7651.67	7868.03	7004.32	7534.4	8861.36	7497.09	6170.31	5954.29	5989.55	3953.27	6989.65	4344.92	6023.73	5613.12	5767.9	7279.92	4696.21	6142.82	5318.54
PC 18_0p-18_3	14989.1	16555.3	12791.6	17878.9	16501.6	17646.8	15250.9	14701.8	17291.7	19320.1	19653.3	14671.9	11674.3	8720.73	4133.2	7999.25	11804.4	8479.33	15363.4	11363	19738	10954.5	14410.5	13268.7
PC 18_1e-16_0	6022.53	5646.74	5401.56	6227.13	7738.4	8728.88	6289.81	7544.58	6431.57	6499.78	6222.71	5689.72	7744.82	8650.97	6026.56	7724.2	5108.1	8934.73	7367.08	9464.04	8275.31	6513.07	7531.74	5984.12
PC 18_1e-18_0	1778.83	1908.88	1668.04	2710.98	3058.52	3021.12	2090.7	2053.15	2103.1	2313.77	2015.55	2254.84	1787.48	2250.01	1705.33	1869.92	1906.61	3056.68	2427.16	2258.5	2366.92	1652.57	1915.63	1831.89
PC 18_1e-18_1	6904.33	5476.22	5465.82	9310.68	6118.2	7295.42	6077.44	5915.01	5536.06	5938.12	5975.37	5824.47	4829.86	7433.47	5150.16	6611.48	4839.22	6294.94	6174.47	5506.2	7902.92	5711.41	7376.19	5895.2
PC 18_1e-18_2	7076.62	7109.11	5756.51	9314.63	7417.55	8479.14	7327.21	7293.33	7562.54	9365.03	7482.9	6378.89	5848.87	5913.5	3588.09	6494.31	4347.67	5970.46	5438.05	5479.19	7864.49	5077.89	6704.62	5531.49
PC 18_1e-18_3	14856.4	16128	12559.8	17907.2	16044.5	17236	14216.3	15495.4	16388.8	19411.2	19526	17695	14719.9	8170.79	4540.42	7462.11	10914.5	12017.2	13367.5	6889.61	19096.5	12025.9	13802.4	13235.6
PC 18_1e-20_4	19180.8	20854.8	17996.7	21634.6	20499.9	25821.3	21295	20823.9	23430.7	23682.3	25792.4	21578.7	23066.2	23356.8	17126.7	22165.7	14298	30822.1	20656.5	22941.8	35594.2	24363.5	22960.9	18566
PC 18_2e-12_0	7.55	1.54	13.17	9.79	12.996	8.39	33.55	10.234	10.108	6.76	11.006	13.98	14.9	6.28	13.71	20.34	10.093	17.4	41.86	0.81	11.71	7.65	17.25	11.87
PC 18_2e-16_0	10216.1	10124.9	8207.57	12194.8	10602.4	10955.9	11155.4	10640.4	10299.2	10162.8	9911.43	9134.97	6511.07	7813.69	3243.72	6611.9	3281.21	5342.56	6739.46	4560.61	5407.48	3821.63	6739.42	4903.33
PC 18_2e-16_1	5468.63	4908.79	4408.94	12127.7	10966.1	9952.83	5704	10231.8	11928	12570.6	7055.25	8598.61	5794.64	5072.5	2852.05	7077.65	3418.89	2823.02	4570.91	3803.09	5087.38	3307.33	5143.91	3442.42
PC 18_2e-18_0	5519.63	5246.26	5133.69	8282.02	6193.32	7365.2	6830.85	5943.25	5608.9	7279.24	5835.38	5170.61	7180.79	7431.24	5122.22	7117.36	4952.08	6508.54	5461.19	5269.39	7125.7	4757.94	8060.12	6993.87
PC 18_2e-18_1	7229.5	7402.72	5683.37	8749.51	7588.46	8117.28	8217.5	7362.9	7336.49	9307.55	7937.68	6643.51	5132.07	6722.12	3320.81	6856.94	4139.35	5404.3	5638.08	5439.89	7444.72	4997.44	5406.01	5453.68
PC 18_2e-18_2	14660.8	16383.8	12701.6	17387	19646.5	16556.8	14785.9	14549.2	16705.3	18533.5	18391	16702.7	7994.84	14572.1	4868.15	8298.56	11590.4	8019.38	14700.7	7520.52	19821	13838	13802.4	12441.7
PC 18_2e-18_3	15482	18666.9	14391.1	16935.2	15543.8	18742.5	15225.2	16350.7	22389.4	23044.5	20313.4	16006.6	30139.6	27635.5	19094.3	21590.1	16829.7	29692.2	17972	21442.2	34736.4	28258.6	24619.8	24836.4
PC 18_2p-16_1	98.27	106.48	80.68	112.39	104.85	229.13	152.21	114.18	105.23	270.49	98.7	91.3	114.49	92.45	137.58	229.56	140.23	186.04	268.91	77.76	264.76	88.09	82.43	159.16
PC 18_2p-18_0	6902.69	7066.6	5549	9274.63	7380.17	8109.1	7961.93	7686.63	7517.62	9499.53	7312.68	6436.92	5726.69	6295.12	3347.73	6827.28	4221.31	5510.99	5931.94	5483.43	7586	5048.84	6029.95	5345.45
PC 18_2p-18_1	15163.6	17393.9	12818.1	17727.8	15405.8	17130.8	14792.6	14828.4	16296	18460.1	18619.2	14790.1	7747.41	8340.9	6132.12	8458.21	11137.3	7383.66	7764.39	7362.23	19015.8	12040	13797.6	12073.6
PC 18_2p-18_2	14564	17105.2	14724.2	15607.9	18237.2	12212.4	15123.2	15762	21488.6	21121.3	19135.4	15694.7	28744.2	22518.3	18752.7	19774.6	16197.8	29546.2	15917.4	18756.9	34670.5	26839	19983.2	23256.3
PC 18_2p-20_3	9831.71	12558.8	10285.7	11947.5	13299.5	11804.9	11597.4	10912.9	13297.6	13923.1	12449.7	10149.6	12811.7	12082.5	10877.8	11149.6	5917.73	14818.6	11462.5	11556.9	17769.4	11258.4	12638.2	10481.8
PC 18_2p-20_4	2000.61	2766.54	2360.76	2764.37	2655.83	2317.49	2941.36	2097.31	3273.91	3314.58	2835.9	2650.45	1447.15	2304.74	2507.11	1522.22	1775.32	2916.28	3231.12	2094.15	1767.63	1497.58	1486.97	2163.56
PC 18_2p-20_5	23665.2	21896.3	31888.6	37957.6	38278.1	37925.4	36506.2	25667.9	23709.2	27588.5	27745	26638.4	36320.6	37469.7	42602.8	37520.2	20792.7	39152.8	40967.5	43003.2	39998.5	36963.8	42698.7	40748.5
SM d18_1-12_0	86.61	186.53	113.2	217.41	112.13	241.44	84.99	211.46	104.72	140.29	132.43	308.01	130.13	203.52	298.95	125.56	56.58	111.73	107.72	299.26	136.14	118.66	166.73	182.67
SM d18_1-16_0	6190.88	6838.49	6409.6	6850.94	6594.69	6606.63	6884.31	6779.5	7092.31	6504.2	6670.13	6679.41	6122.43	6271.6	6398.68	6287.8	4522.95	6429.52	6328.17	6772.7	6828.95	6306.11	6685.68	6730.58
SM d18_1-16_1	1478.67	1703.66	1502.32	1410.99	1624.45	1416.72	1436.69	1516.97	1735.61	1449.68	1830.11	1558.8	1553.42	1714.81	1703.88	1418.31	973.61	1519.61	1536.78	1501.85	1691.05	1567.87	1770.43	1605.26
SM d18_1-17_0	796.1	964.69	823.39	900.17	969.9	1201.12	862.55	887.73	1061.88	807.37	901.46	826.26	964.75	1166.91	1019.44	853.52	452.13	1268.44	950.31	1007.12	1292.18	889.77	1119.29	828.57
SM d18_1-18_0	4890.31	4773.35	4253.77	4550.54	4986.55	5026.61	4619.01	5200.21	5777.6	4851.75	5289.39	3786.71	5464.98	5244.83	5115.72	4810.2	2367.58	5831.86	5610.42	5782.03	5753.36	5385.19	5770.16	3428.23
SM d18_1-18_1	4743.53	4646.03	4439.26	4351.07	5099.47	4542.4	4575.1	4772.1	5480.43	4809.18	5172.08	3836.7	4927.3	4864.2	4946.27	4544.21	2712.19	5142.15	5309.09	5212.83	5551.84	4989.23	5255.43	3424.19
SM d18_1-18_2	445.61	472.87	461.17	412.2	413.86	387.71	386.01	343.45	514.55	391.52	603.77	416.34	411.63	495.33	484.03	435.33	207.08	375.55	360.05	402.61	559.22	402.86	505.72	537.08
SM d18_1-18_3	67.35	92.42	53.9	47.54	58.08	60.71	67.95	68.29	82.24	50.53	91.16	70.98	60.13	69.41	58.85	62.65	24.35	40.28	32.34	46.66	75.11	48.43	74.35	81.39
SM d18_1-20_0	7916.32	7648.96	7697.33	7901.31	7426.95	7225.27	7577.63	7349.07	7839.29	7739.38	7604.66	7716.15	5743.69	5288.24	5461.53	5473.36	5820.65	5346.81	5285.47	5412.94	6021.25	5581.84	5959.16	6280.2
SM d18_1-20_1	2975.03	2811.15	2605.33	2829.85	3355.96	2493.9	3550.9	3604.62	4024.68	3018.58	2831.93	1796.28	3025.89	2616.17	2735.92	2604.64	1417.89	2918.94	3283.3	3760.18	3560.18	3413.36	2887.53	1678.98
SM d18_1-20_2	145.71	163.89	154.79	101.39	143.35	135.45	112.02	151.05	230.15	131.84	197.41	136.79	143.89	215.71	157.13	125.27	70.88	148.77	151.25	187.18	213.05	137.96	192.72	128.63
SM d18_1-20_3	40.34	54.95	45.17	23.3	41.41	35.58	30.35	50.64	74.37	33.28	69.85	47.96	43.22	68.59	52.84	40.11	17.45	39.71	34.81	57.35	72.2	31.01	69.57	45.7
SM d18_1-20_4	3.73	5.48	3.82	4.836	3.88	2.55	2.85	5.48	10.87	3.6	8.96	7.35	3.95	9.46	8.13	3.01	4.74	3.89	5.19	7.67	10.21	0.4	12.04	3.86
SM d18_1-20_5	4.75	10.88	10.4	9.07	9.58	14.52	7.76	10.16	15.52	12.1	15.24	8.37	9.14	12.04	17.29	10.19	2.65	20.94	14.53	11.48	22.64	12.55	21.28	5.93
SM d18_1-22_3	658.61	744.68	650.44	529.22	842.19	791.2	603.93	797.02	604.48	723.06	904.36	923.65	688.77	598.78	798.48	386.48	577.57	570.81	513.69	837.69	334.94	634.82	1164.89	754.95
SM d18_1-22_5	33.6	60.01	43.72	62.94	62.44	55.81	46.72	63.8	44.99	49.46	46.55	59.22	99.38	132.06	120.72	112.76	48.11	171.26	112.72	142.09	141.09	127.99	152.09	113.99
SM d18_1-22_6	51.32	49.12	47.88	66.64	50.74	48.76	39.6	57.61	62.29	45.29	62.22	52.96	91.27	122.48	143.01	155.25	38.2	110.74	88.46	108.76	146.04	124.35	205.98	116.69
Sphingosine	27.11	52.24	116.81	122.41	112.53	83.058	46.52	15	62.83	72.455	169.63	85.037	101.66	109.49	104.53	85.424	57.228	86.575	124.76	193.01	116.23	163.01	92.57	68.62
TAG 46_2	3.7125	3.49	2.99	6.36	2.28	12.76	2.65	3.64	6.25556	27.63	5.553	6.202	7.97	1.6	12.83	4.377	3.67	2.68	2.19	8.354	3.52	5.34	18.88	4.76
TAG 48_0	89.36	185.29	160.98	137.98	201.8	559.36	82.7	164.8	38.89	605.77	134.22	176.37	388.69	154.84	497.61	43.98	192.61	247.11	81.81	190.12	55.54	232.84	287.46	90.67
TAG 48_1	51.01	126.56	48.89	51.52	117.25	436.92	35	96.84	11.3	154.24	30.63	72.86	143.01	50.34	284.18	26.62	61.19	70.81	40.98	156.67	10.9	65.72	121.6	75.99
TAG 48_2	523.4	1516.92	570.39	680.7	1354.13	2789.45	551.27	1148.24	174.88	1587.11	604.23	515.58	1309.66	731.48	3188.25	488.62	910.31	734.27	557.31	1563.39	186.93	1222.11	1116.19	694.42
TAG 50_0	1338.8	1925.32	1616.23	1460.75	1743.58	2407.87	1177.74	1363.13	1275.78	3341.6	1582.47	1534.71	2546.92	1547.37	3130.59	880.88	1940.94	2062.63	1536.35	1747.84	1181.35	2197.13	2499.43	1468.07
TAG 50_1	79.42	116.34	99.74	91.21	155.31	200.09	71.01	85.06	36.57	261.82	119.06	116.04	214.33	128.05	290.05	48.5	119.39	193.93	111.96	135.71	50.43	161.36	206.76	85.78
TAG 50_2	447.6	913.01	710.62	649	962.13	1226.9	619.93	780.49	409.11	1110.75	912.07	982.87	1016.32	903.11	1820.9	547.79	930.32	1049.66	1035.07	1144.11	365.35	1259.69	979.95	587.89
TAG 50_3	9.99	13.38	18.04	27.24	25.13	61.45	17.59	10.7	4.22	27.66	33.04	14.12	22.58	13.04	59.91	12.51	33.94	32.56	11.23	41.7	5.17	17.91	62.64	12.39
TAG 50_4	117.38	116.17	141.73	113.16	159.68	155.4	158.41	124.38	45.22	184.65	161.53	137.61	153.11	156.68	248.89	85.73	84.52	71.01	79.46	153.61	46.73	144.14	238.24	94.34
TAG 52_2	3478.56	3751.48	4270.82	4279.03	4139.98	3866.29	3261.17	2305.96	2049.02	5349.54	4618.53	3360.72	5607.08	4306.84	5882.51	2829.09	2869.76	3705.8	3666.47	3563.33	2371.23	4160.93	6921.4	3210.42
TAG 52_3	5574.24	6853.78	6388.97	6388.4	6569.9	4340.6	5861.52	2089.92	4327.27	5114.25	8008.52	5807.77	6561.28	7522.44	8506.76	5635.24	4658.55	5406.53	6841.75	5895.5	3874.69	6177.54	6722.93	5058.85
TAG 52_4	2825.47	2938.16	3601.02	2540.19	4142.09	1721.24	3434.35	2180.44	1583.94	2488.43	4011.99	3155.52	3143.41	3571.24	4489.45	2601.21	2090.01	1976.12	2645.77	3020.43	1449.13	2755.99	8973.02	2078.09
TAG 52_5	216.66	196.47	274.31	177.99	351.14	146.83	294.62	182.33	112.05	176.67	313.97	205.6	209.94	282.92	337.78	231.71	149.48	124.14	154.6	208.58	92.53	209	379.09	167.24
TAG 52_6	16.9	16.62	20.21	17.97	34.59	16.42	24.86	14.69	8.82	21.24	28.34	16.18	15.25	20.12	27.95	16.27	13.27	13.07	12.12	19.34	9.05	17.33	35.05	17.63
TAG 54_1	774.15	904.71	1158.55	1290.52	905.61	1596.77	806.27	425.41	366.27	2129.29	1371.76	565.84	1683.55	1369.81	2997.83	849.19	883.85	1313.35	1369.48	1815.3	797.82	1241.34	3001.87	952.67
TAG 54_2	3206.59	3650.07	4458.11	5196.91	3505.65	4450.49	3661.09	2001.58	2024.06	6182.54	5336.12	2524.5	6014.79	5260.4	8365.22	4395.49	3502.08	4416.03	5845.62	5489.28	3663.04	4493.13	8717.31	3677.75
TAG 54_3	4071.66	4234.38	5652.73	6239.53	4671.23	3603.54	4824.31	2858.62	2833.97	5501.97	5792.08	3141.12	6351.86	5884.19	6645.12	5664.18	3648.59	3933.54	5714.84	5273.95	4097.94	4674.26	8207.96	4202.07
TAG 54_4	12299.4	12471	14615.4	13694.8	13671.6	10007.8	14254.5	10824.5	10719.8	12367.8	15459	12090.9	14028.4	14542.9	16352.9	12290	11255.6	10829.5	13907.8	13851.9	11387.9	12289.3	17510.1	12278.1
TAG 54_5	3400.93	3269.74	9356.53	4235.75	5021.99	1549.14	9521.79	2485.43	2057.65	2704.54	9377.89	3178.29	4277.08	9173.77	8911.11	8363.14	2066.58	1885.48	3216.67	3988.79	2467.83	2760.26	11128.4	2939.03
TAG 54_6	606.9	520.39	1009.99	523.69	906.96	266.17	1122.81	403.79	258.88	468.14	905.08	491.65	635.74	740.91	757.7	559.93	305.07	249.34	404.42	590.6	228.84	391.06	1328.62	383.69

## Sheet: SIT(A-pre;B-post)
	1A	2A	3A	4A	5A	6A	7A	8A	9A	10A	11A	12A	1B	2B	3B	4B	5B	6B	7B	8B	9B	10B	11B	12B
CE 14_0	0.88	1.01	1.651	1.74	1.55286	0.96	1.59	0.97	0.89	4.5	1.04	1.32	1.45	1.22667	1.05	2.07	1.02	1.05	0.94	0.93	1.67444	1.80889	1.81	1.09
CE 16_0	1.95	6.06	5.15	10.09	10.42	7.07	9.03	3.47	1.64	8.94	4.43	6.27	6.29	7.75	5.11	7.92	10.75	15.11	12.74	5.42	4.92	4.73	7.44	2.52
CE 16_1	0.98	1.70778	0.96	1.46	2.64	1.04	1.32	0.92	2	1.89286	1.60714	1.46	1.03	1.16	1	1.47667	1.49571	1.27	2.75	2.61	1.21	1.37	1.08	1.17
CE 17_0	1.33	3.35	1.59	1.2	1.69	2.07	1.31	1.13	4.34	1.3	2.22	1.18	1.32	1.21	1.34	1.34	1.53167	1.16	1.79	1.01	1.09	2.21	1.32	1.72
CE 18_0	4.78	6.36	4.97	7.1	5.31	9.73	6.9	2.87	1.97	6	2.52	5.32	5.57	4.48	6.69	4.64	6.92	9.91	6.67	9.92	6.02	4.73	2.02	2.84
CE 18_2	361.03	320.12	360.35	531.98	367.04	441.66	427.31	271.18	303.86	726.93	309.62	275.25	261.39	253.51	265.28	270.33	248.71	332.66	401.33	355.3	262.76	428.48	275.38	220.29
CE 20_0	2.28	2.24	1.77	3.35	4.22	2.14	2.47	3.46	3.13	2.4	2.36	1.79	3.63	3.98	2.85	1.26	2.75	3.32	2.61	4.26	2.96	3.9	1.23	3.15
CE 20_2	1.21	2.23	1.15	1.03	1.17	3.25	1.36	1.61	1.15	1.45	3.7	2.09	1.52	1.66	1.29	1.1	1.35	2.58	2.11	1.24	1.17	1.66	1.62	0.99
CE 22_0	4.21	1.07	1.33	1.4475	1.65	2	0.89	1.49	1.33	1.1	1.33	1.22	1.39	1.42	1.35	1.5775	1.19	2.4475	1.25	1.99	0.99	1.05	1.8725	1.52
Cer d18_1-16_1	456.6	693.38	800.69	685.65	1079.74	943.52	864.14	407.38	573.48	1411.99	642.26	1041.01	854.34	872.51	813.73	825.85	1012.31	857.8	1103.11	872.72	881.84	1302.96	1009.28	874.03
Cer d18_1-18_1	22.77	42.42	30.1	34.04	68.21	47.48	35.13	19.2	40.63	55.95	23.36	122.83	46.84	53.27	46.03	55.93	55.29	47.17	80.74	23.11	49.58	70.42	37.08	89
Cer d18_1-20_1	15.86	28.13	10.28	21.04	50.88	34.91	27.72	17.04	30.68	42.46	23.56	96.31	21.08	35.51	18.77	49.41	32.04	27.64	30.47	7.25	35.16	52.1	39.46	55.1
Cer d18_1-20_4	728.65	1079.89	731.75	1034.71	648.95	774.44	1410.94	738.2	607.22	1578.37	901.52	718.81	776.45	1075.43	701.94	901.57	710.24	567.22	1234.08	754.6	872.32	1387.91	906.1	644.82
Cer d18_1-22_0	1118.48	1421.06	1159.17	1741.74	1139.44	1249.2	2377.48	1170.39	972.96	2468.68	1483.84	1151.75	1283.56	1616.47	1051.15	1461.13	1193.19	1028.95	1717.91	1262.17	1435.95	2122.54	1429.96	1133.52
Cer d18_1-22_1	198	257.55	315.17	305.72	348.24	326.02	352.85	128.32	268.41	430.11	334.59	687.19	256.35	278.98	234.17	276.55	423.86	340.54	294.05	292.09	408.42	396.56	471.8	568.04
Cer d18_1-22_2	2157.4	2617.94	2008.8	2718.01	2027.52	2384.27	3914.71	2036.93	1739.67	3541.75	1892.68	2245.47	2298.46	2989.48	1986.59	2580.35	1702.13	1992.5	3355.4	1672.32	2594.27	3405.31	2311.73	1590.73
Cer d18_1-22_3	68.54	118.46	103.39	131.18	153.85	127.24	119.12	51.33	115.38	163.15	127.77	271.97	101.88	82.71	81.86	120.49	151.69	136.04	129.89	68.59	153.3	147.95	183.89	191.44
Cer d18_1-22_5	572.9	1022.71	484.87	669.36	650.67	747.21	812.83	637.9	324.55	1114.58	499.38	712.8	599.1	961.87	548.14	602.37	736.54	668.92	1142.66	543.17	654.31	1162.56	805.81	407.71
Cer d18_1-22_6	68.5	100.75	42.34	59.21	61.31	22	89.28	50.23	21.86	124.37	39.36	66.88	55.01	106.62	54.28	56.21	52.39	43.25	92.91	56.54	53.9	152.6	72.46	42.8
DAG 12_0-16_0	2.73	1.76	1.95	2.06	2.09	1.02	0.98	2.39	1.87	1.22167	1.86143	1.53	0.97	1.81	1.333	1.18	1.50571	3.15	1.3	2.33	2.4	1.791	1.08	1.18
DAG 12_0-18_2	2.03	2.944	6.64	3.79	1.6	2.27	3.03	3.02	3.61	6.56	2.18	1	3.27625	6.03	2.48	3.82	3.58	4.12	1.83	4.43	9.73	7.03	2.78	2.05
DAG 12_0-18_3	21.31	34.32	28.99	47.23	13.12	30.74	12.08	19.32	47.44	68.67	43.03	30.06	9.41	48.04	7.99	63.52	14.84	41.31	10.77	26.63	38.95	35.24	14.18	18.28
DAG 14_0-16_0	4.48	11.6	4.18	5.05	5.18	1.91	9.41	2.96	4.25	6.66	5.57	4.02	5.14	10.71	10.67	6.87	7.3	9.03	13.12	11.47	12.26	14.85	5.32	4.7
DAG 14_0-18_0	2.76	7.07	6.14	3.94	9.72	5.11	8.56	2.51	10.14	9.56	6.67	6.66	6.78	6.29	4.47	5.55	16.61	4.74	15.16	6.42	11.9	8.2	6.84	8.83
DAG 14_0-18_1	6.24	4.94	5.95	8.76	5.48	7.1	4.86	4.19	5.71	4.33	7.9	11.27	4.14	11.51	4.53	1.42	6.95	2.17	5.58	4.32	8.17	4.24	11.55	5.35
DAG 14_0-18_2	6.62	5.64	2.11	4.58	1.5	1.64	2.37	5.58	1.35	3.355	2.72	2.05375	5.51	5.56	3.78	1.93625	2.294	2.37	2.99	1.86	2.67778	2.68	2.74	2.77889
DAG 14_1-18_1	57.83	75.68	29.99	72.67	43.23	91.74	42.02	51.51	35.89	29.03	74.79	30.12	31.9	21.58	23.53	32.46	21.15	41.49	38.58	33.6	23.05	47.86	69.39	9.24
DAG 14_1-22_4	13.79	25.75	6.76	7.53	10.28	11.15	11.06	19.58	20.21	10.11	14.89	26.63	27.17	12.45	18.39	30.98	9.25	15.47	14.05	8.18	5.18	9.13	13.23	9.75
DAG 14_1-22_5	2.5	4.56	2.32	2.47	1.69	3.03	1.89	1.57	3.86	4.14	3.67	2.97	3.15	1.9	4	2.76	3.35	2.39	2.77	2.76	1.49	1.42	4.03	3.87
DAG 14_1-22_6	1.06	2.15875	2.22	2.7	1.8075	2.42	2.85	1.59	1.68	2.76	1.7125	1.98	1.58	1.22	1.1	1.53875	2.09	1.25	0.91	1.15	1.56	2.6	2.23	2.34
DAG 16_0-16_0	215.33	317.97	186.21	388.04	511.53	246.03	467.48	146.49	185.17	507.04	343.47	253.75	218.05	360.2	299.56	350.32	487.5	455.31	923.97	278.64	324.73	400.63	454.49	243.07
DAG 16_0-16_1	5.59	5.3	8.66	5.81	3.01	7.49	13.48	7.63	10.75	7.58	8.73	10.23	6.14	12.77	4.47	7.41	16.34	8.55	12.72	5.71	12.79	10.14	20.21	8.46
DAG 16_0-18_0	200.47	378.22	245.53	509.44	565.36	285.05	620.89	113.87	196.44	627.98	330.9	284.92	196.53	498.69	311.92	487.22	618.97	540.25	519.22	476.09	670.05	603.97	540.57	215.98
DAG 16_0-18_1	5.65	16.59	6.75	16.09	17	14.3	10.8	4.76	10.79	9.86	7.22	18.49	6.49	15.13	9.05	13.17	10.91	10.96	9.77	4.32	14.86	9.78	11.95	6.63
DAG 16_0-18_2	7.84	24.57	10.41	15.87	13.59	13.78	17.21	7.98	15.3	20.63	13.29	14.74	7.76	14.81	9.78	10.19	10.44	10.6	4.37	7.22	13.51	10.04	13.22	15.88
DAG 16_0-20_1	3.1	1.88	3.7	2.285	2.67	3.4	1	1.2	1.51	1.91	1.77	5.38	1.98	2.16	1.1	1.49	1.89	1.3	2.41	4.29	2.59	2.61	0.99	1.8
DAG 16_0-20_4	1.32	7.17	2.41	5.85	4.16	8.9	3.08	3.48	18.17	8.85	4.61	7.8	4.52	5.24	2.42	5.64	10.2	7.73	7.33	4.03	9.23	4	8.41	4.45
DAG 16_1-16_1	2.28	1.83667	0.95	1.32	1.01	2.81	2.25	2.9	1.73125	0.94	1.3	3.55	1.13	1.65	1.63556	1.16	1.33	2.38875	2.25	1.45	1.22	1.71	2.12	1.87
DAG 16_1-18_0	0.91	2.42	2.35	0.9	1.24	0.9	1.56	1.05	1.89	0.9	1.87	2.05	1.45	1.38	0.93	2.74	1.98	4.71	1.12	1.16	1.75	1.53	2.33	0.92
DAG 16_1-18_1	0.93	2.54	1.69	3.09	10.28	22.42	8.49	2.84	4.76	11.52	5.38	9.56	2.6	3.25	1.14	13.57	1.25	6.7	5.34	1.63	4.35	9.77	3.18	6.17
DAG 16_1-18_2	2.37	2.74	2.11	5.92	2.79	3.09	4.22	3.74	6.12	1.46	4.06	2.55	4.27	2.77	2.82	9.09	3.04	8.25	9.47	1.71	4.87	6.26	3.72	1.04
DAG 18_0-18_0	207.4	294.67	204.2	304.22	482.03	358.09	616.71	160.29	168.37	479.7	257.51	310.73	209.38	476.51	394.21	314.45	438.88	849.3	418.3	388.1	423.24	572.63	491.91	192.08
DAG 18_0-18_1	2.69	5.95	2.55	3.55	3.07	7.2	7.68	1.95	10.08	6.51	4.21	6.91	1.17	3.96	1.42	4.73	4.2	4.07	8.05	1.43	4.89	3.3	4.65	6
DAG 18_0-18_2	3.02	11.66	6.34	2.61	5.81	8.3	7.6	4.84	7.3	6.5	4.3	6.43	2.62	10.2	8.9	5.36	8.11	7.56	5.12	6.93	7.67	4.57	9.88	4.68
DAG 18_0-20_0	8.89	13.49	5.78	6	5.55	2.46	5.19	3.61	3.67	11.82	11.85	2.19	6.48	6.8	10.54	4.98	10.13	6.42	14.72	6.33	4.44	10.91	8.33	7.3
DAG 18_0-20_1	7.95	1.36	2.07	1.28	2.01	1.32	1.57	4.05	1.08	2.3575	1.54	2.01	2.5	1.06	4.34	1.57111	1.59	1.64	1.90667	2.83	1.04	1.18	2.18	3.5
DAG 18_1-18_1	21.94	73.9	38.37	47.7	61.09	104.52	49.55	42.44	91.29	30.01	44.14	70.91	28.86	60.03	44.26	24.67	35.14	39.21	44.81	15.39	72.63	51.55	59.65	32
DAG 18_1-18_2	38.15	63.57	52.29	96.26	75.03	126.11	57.42	45.49	80.36	110.55	47.15	75.01	49.64	71.41	24.21	51.86	60.01	41.39	43.07	33.03	65.01	56.21	62.34	33.94
DAG 18_1-18_3	6.77	3.85	6.85	9.55	7.72	13.39	11.14	6.66	19.69	17.51	9.1	12.11	3.73	7.29	7.81	6.77	5.81	6.21	5.04	3.05	12.79	5.83	13.77	7.43
DAG 18_1-20_0	1.19	1.4	1.69	1.64222	1.6	1.73	1.27	1.61	1.76143	1.07	1.45	2.54	0.96	1.3	1.75	1.59	1.2	2.24667	1.17	1.15	1.79	4.28	2.52	1.06
DAG 18_1-20_1	1.07	1.66	0.95	1.96	1.01	2.58	1.25	1.32	1.14	1.51	1.19	1.6	1.66	1.29	1.45	1.72	1.07	2.43	0.99	1.09	1.39	0.98	2.86	2.85
DAG 18_2-18_2	59.86	79.88	84.18	131.22	91.68	75.68	78.37	55.5	89.97	159.3	66.19	83.25	52.16	55.8	42.76	43.07	69.35	59.93	31.85	28.85	82.57	77.86	120.22	34.35
DAG 18_2-20_0	3.9	0.92	2.29	0.98	1.60375	1.653	1.45	1.14	0.99	3.67	1.73333	0.97	1.85	1.3	1.24556	2.69	1.98	2.24222	1.47	2.51	1.34	1.35	2.04625	3.6
DAG 18_2-20_1	9.87	7.64	1.15	5.95	3.43	6.1	2.97	1.49	1.67	2.9	1.83	1.39	1.62	2.17	3.7	2.72	2.69	2.23	2.09	1.44	3.08	2.78	5.13	2.32
DAG 18_2-20_2	1.65	4.26	3.46	3.25	4.2	1.28	1.1	1.72	2.38	1.91167	1.53	3.02	1.07	3.18	3.71	1.88	1.59	2.05	1.27	1.19	2.18	1.69	2.54	0.91
DAG 20_0-22_1	2.38	2.39	1.78	2.61	2.17	2.07	2.5	4.45	1.45	3.19	2.03	2.48	2.78	2.35	5.06	1.3	1.05	1.47	2.11	3.7	1.89	1.93778	1.85	5.69
DAG 20_0-22_6	20.94	40.4	25.51	39.81	33.54	42.49	29.97	28.21	10.8	66.2	27.43	29.87	17.89	22.32	15.94	16.01	41.18	36.54	52.39	44.14	20.05	58.86	23.05	26.14
DAG 22_0-22_2	1.14	1.28	1.03	1.58714	1.14	1.38	1.47	1.27	1.24	1.77875	1.27	1.975	1.51222	1.37	1.17	1.45	1.6	2.19	1.49889	1.16	1.84	1.24	3.36	1.02
FFA 12_0	564.74	1451.6	783.4	388.79	617.78	617.21	1213.62	1549.29	689.79	384.9	430.12	797.46	312.01	874.99	638.07	216	247.63	687.55	351.24	290.48	477.74	352.47	373.21	423.61
FFA 12_1	239.16	229.42	121.5	150.7	142.58	153.85	120.9	344.53	110.08	206.35	94.01	160.62	68.18	128.69	71.19	50.08	107.4	245.36	62.06	58.24	133.49	133.17	73.15	67.38
FFA 14_0	2133.31	3238.64	1662.91	1734.19	1655.19	1692.5	1507.69	3252.55	1858.3	1471.94	1349.08	1956.63	1168.72	1336.82	1534.25	1005.43	1056.99	1963.87	1094.99	1084.62	1167.49	1353.79	1129.2	1221.96
FFA 14_1	427.46	525.46	258.75	380.65	284.38	279.27	273.08	778.11	331.92	398.89	196.5	357.09	136.78	228.85	167.87	79.55	170.68	478.38	123.74	109.12	284.84	222.55	138.24	161.41
FFA 16_0	10474.3	10524.2	9425.49	10086.2	9921.34	9658.73	9894.92	11392.5	9809.89	10025.7	9314.46	10163.5	9790.65	9585.66	9199.53	9563.97	9543.32	10229.1	9018.16	9008.05	9844.64	9711.46	8957.98	8821.9
FFA 16_1	6571.14	7487.75	3955.39	6437.87	4366.13	3805.46	3491.83	8497.84	4053.26	4321.37	4024.9	6287.67	3152.63	2716.3	3139.65	1601.57	3014.31	4479.99	2995.14	2198.58	4948.24	4119.13	2767.36	2575.25
FFA 16_2	182.99	164.88	109.55	105.23	105.52	151.73	99.14	183.01	132.24	249.77	110.02	124.27	104.03	111.35	63.72	41.59	87.08	188.96	35.05	96.89	90.99	84.58	58.59	90.11
FFA 17_0	1008.92	1072.19	719.64	643.82	656.53	702.94	568.65	820.7	672.58	887.75	642.64	916.64	701.26	801.61	605.9	515.069	574.18	842.18	493.82	551.3	639.85	853.79	627.5	662.35
FFA 17_1	307.96	451.18	182.04	233.05	252.57	203.38	163.9	459.54	218.39	226.99	192.42	365.59	159.8	212.83	148.23	71.97	169.05	234.75	131.68	128.55	253.12	270.27	145.61	129.14
FFA 18_0	10571	10933.6	10231.6	10202.4	10148.5	9320.82	10843.8	10732.4	9892.57	10969.2	9690.26	10292.8	10268.2	10631.4	9248.69	9022.33	9914.67	10032.6	9113.76	8032.81	9346.23	9316.26	9049.58	9413.39
FFA 18_1	13659.9	14210.3	11988.8	13099.7	13061.5	12604.6	12616.2	15106.3	12412.1	13120.1	11612.1	12842.1	12063.2	12396.1	11279.1	10905.9	12239.7	13442.1	11144.9	10941.4	12839.6	12217.9	10934.2	10748.4
FFA 18_2	12782	12736.4	11164.9	12056.3	11654	11008.5	11349.7	13344.1	11122.6	12937.8	9998.09	11736.7	10957.2	11262.7	9973.54	9509.84	10801	12240.4	9393.75	9612.18	11726.4	11304.3	9712.58	9404.75
FFA 18_3	4782.09	5082.97	3815.39	3685.3	4274.31	4362.01	3666.08	6459.53	3472.84	6996.51	2670.37	4819.82	2254.26	3580.63	2461.01	998.17	2977.11	4743.26	1464.35	2446.64	3753.07	3367.76	2027.99	1987.91
FFA 18_4	33.28	40.24	25.56	28.77	31.27	35.42	28.96	39.75	51.89	56.48	37.29	55.19	11.42	26.75	16.35	7.18	21.02	39.42	4.8	29.18	29.06	21.81	10.14	25.65
FFA 20_0	520.58	501.1	357.33	386.03	402.65	526.65	457.51	384.25	321.83	363.43	328.42	397.99	295.13	404.98	368.95	309.2	338.81	432.32	384.6	361.08	380.38	509.11	321.8	381.01
FFA 20_1	806.23	1113.85	567.75	775.61	744.85	1350.22	581.62	1219.48	510.03	734.6	504.2	704.6	544.84	740.67	506.72	324.42	716.94	1332.55	458.8	480.5	715.42	595.69	420.64	432.53
FFA 20_2	1046.97	983.9	705.68	867.36	886.76	885.4	708.06	1198.5	644.5	1127.57	532.41	843.29	709.13	748.09	594.15	366.07	691.62	1055.31	453.42	487.92	757.15	688.67	449.88	573.3
FFA 20_3	1119.4	942.02	720.08	724.08	948.49	889.68	710.98	1276.53	849.25	1114.56	655.22	1098.14	780.5	823.66	562.37	394.56	806.71	1192.14	469.95	642.45	832.96	622.23	565.26	724.07
FFA 20_4	3730.62	2507.62	2108.91	1769.76	3176.73	2565.57	2175.22	3565.12	2027.32	3212.8	1935.69	2826.95	2083.14	2164.03	1325.13	939.78	2063.29	3545.17	1224.31	1698.47	1819.79	1861.21	1540.06	2257
FFA 20_5	11.12	69.53	75.24	136.92	267.9	231.77	137.8	277.69	174.22	172.22	426.51	354.87	17.64	111.167	61.02	4.69	6.47	148.245	13.76	97.526	16.34	11.15	27.33	112.68
FFA 22_0	397.81	211.22	199.39	420.58	409.68	354.66	283.73	233.97	210.16	313.45	138.36	313.09	178.85	323.1	195.27	258.88	299.24	362.6	273.49	165.04	337.1	282.53	257.33	198.52
FFA 22_1	231.53	254.05	209.47	247.85	251.34	724.1	220.74	267.28	212.6	199.09	191.65	241.03	217.03	226.62	193.95	233.87	228.98	566.37	191.78	201.72	215.69	227.62	183.31	173.55
FFA 22_2	24.07	26.32	11.8	59.71	10.97	16.71	18.302	88.85	20.47	25.1887	16.14	27.5	10	20.7033	10.56	19.5038	13.078	22.5057	11.09	2.29	17.92	13.84	3.48	5.12
FFA 22_3	58.54	72.64	45.75	60.7	61.15	86.11	46.14	99.63	48.44	68.09	39.29	69.03	69.36	3.62	17.69	43.82	72.78	8.11	37.35	61.69	2.02	2.55	22.98	45.8
FFA 22_4	648.54	627.56	436.95	469.74	532.44	480.27	293.16	891.1	374.19	600.47	246.47	571.92	465.26	469.15	289.1	176.72	478.28	793.56	237.33	326.12	461.41	333.53	281.96	268.34
FFA 22_5	1063.19	921.93	702.76	680.17	1157.5	1144.12	788.83	1237.48	686.86	987.67	779.25	1066.02	652.01	745.41	478.3	339.87	750.55	1324.25	411.82	612.13	590.37	575.24	527.17	648
FFA 22_6	1691.55	1570.36	1118.94	996.95	1820.69	2033.17	1222.01	1595.87	1023.13	1646.62	1255.91	1660.35	1083.13	1194.94	587.02	465.46	1064.21	2092.25	598.65	965.35	735.66	997.68	927.21	1005.16
HexCer d18_1-12_0	29.15	53.64	44.66	58.7	74.22	55.67	64.19	23.42	22.79	63.61	48.24	139.19	47.32	40.83	44.31	59.14	50.42	62.62	60.41	30.7	65.06	59.94	74.66	70.34
HexCer d18_1-14_0	7.19	43.46	37.42	27.42	27.08	16.77	41.96	15.13	27.71	47.85	29.46	50.78	17.17	57.91	59.21	21.87	22.15	23.48	56.97	24.93	50.26	45.32	41.12	31.72
HexCer d18_1-16_1	817.41	961.93	1199.7	1545.15	2287.21	2183.35	2048.01	684.87	1057.95	2182.97	1066	2231.97	2081.45	1513.36	1002.56	1507.81	2396.69	2175.16	2610.31	1675.87	1630.97	2362.5	1988.82	1461.33
HexCer d18_1-18_0	478.5	693.42	521.47	586.72	639.3	464.74	640.68	504.3	316.89	1282.21	431.79	714.04	500.41	968.65	522.28	583.01	653.01	566.55	862.44	504.51	709.54	1055.33	534.71	500.2
HexCer d18_1-20_0	659	1097.22	679.37	686.12	853.23	633.64	1206.73	645.17	509.64	2007.95	617.52	811.3	685.39	1019.88	602.59	665.36	752.89	602.93	1313.26	735.87	897.61	1481.58	832.43	571.64
HexCer d18_1-20_2	191.35	246.41	189.8	234.7	198.93	202.85	313.17	150.95	140.84	410.22	153.73	190.8	142.83	253.22	129.3	195.57	234.67	141.29	276.56	155.96	244.5	398	164.18	146.79
HexCer d18_1-22_0	6269.02	8149.13	7853.09	9922.07	5980.27	7632.34	14434.2	7840.87	4869.14	13800.6	8061.13	7160.02	8212.08	11327.5	6284.6	8511.39	6632.23	5794.23	11110.5	6988.4	8286.02	11164	7366.24	6719.58
HexCer d18_1-22_1	573.34	761.92	565.48	782.42	602.36	967.63	1059.54	540.64	438.42	1052.1	486.53	677.45	597.78	794.31	560.77	686.41	635.84	591.3	1012.78	509.24	780.96	937.87	693.69	390.61
HexCer d18_1-22_3	58.73	115.01	55.88	50.34	106.05	77.59	108.47	63.65	43.71	114.45	78.43	116.75	68.38	116.5	90.08	73.71	97.36	78.85	148.94	65.67	91.74	137.52	103.06	59.12
LPA 16_0	472.09	397.68	538.17	456.19	494.7	529.14	596.13	535.57	594.59	194.56	393.4	521.5	481.74	471.53	481.68	456.15	475.2	457.08	630.65	500.75	532.88	368.16	293.57	474.28
LPA 16_1	1.47	3.85	5.05	9.68	3.16	0.99	1.39	8.91	19.16	3.52	16.08	6.72	6.37	11.08	6.97	8.7	14.29	6.86	4.57	3.27	9.05	5.49111	5.67	4.18
LPA 18_0	221.42	264.53	275	231.03	229.05	253.27	311	243.83	336.79	318.59	267.96	268.38	221.27	247.58	215.09	191.89	216.01	188.37	311.03	213.56	263.31	276.8	249.4	210.99
LPA 18_1	113.69	155.69	179.1	184.7	141.93	195.58	169.25	200.81	157.95	179.07	157.7	126.05	117.01	160.46	134.16	206.21	186.57	154.16	232.8	167.83	180.71	147.77	194.05	108.81
LPA 18_2	218.73	275.14	408.39	504.72	270.71	312.86	331.74	429.24	281.49	503.02	330.31	267.1	272.23	390.78	353.41	475.12	381.57	338.48	441.23	390.07	424.3	304.52	356.79	208.78
LPC 15_0	138.84	190.64	249.86	143.25	153.08	224.63	192.64	145.2	392.23	193.08	256.75	283.31	139.08	191.62	196.05	184.38	176.83	154.5	194.84	190.99	222.82	200.28	217.03	196.85
LPC 16_0	2120.79	2112.92	2275.99	2008.62	2130.62	2178.65	2431.52	2218.36	2313.32	2198.74	2317.93	2295.47	2082.45	2068.03	2054.8	2021.14	2021.6	2008.48	2324.8	2167.73	2242.36	2020.09	2325.79	1995.68
LPC 16_1	401.95	531.26	601.2	497.51	408.77	560.58	631.8	601.9	936.11	540.31	710.64	639.03	384.09	471.75	491.56	767.31	636.72	423.18	718.94	518.88	693.58	448.73	629.66	417.68
LPC 18_0	405.53	423.2	514.91	409.96	416.53	433.78	638.44	450.5	647.06	563.94	493.92	533.54	380.53	441.38	391.22	348.42	450.39	339.72	643.68	389.69	486.43	473.01	468.62	346.52
LPC 18_1	168.94	219.45	344.25	325.29	240.77	331.24	386.56	358.01	314.7	334.4	322.56	243.06	185.55	294.38	247.33	394.32	348.25	248.55	482.72	291.02	348.25	245.43	347.49	173.66
LPC 18_2	659.29	718.74	1305.09	1489.39	717.91	904.49	1016.31	1143.5	812.33	1467.04	1007.17	771.44	710.15	1194.39	681.14	1600.07	1143.32	987.57	1362.97	1146.3	1264.67	837.45	1128.26	582.57
LPC 18_3	134.88	201.52	331.74	244.57	168.5	238.38	290.53	262.81	377.83	304.8	302.25	247.96	96.53	314.33	204.59	277.29	248.46	167.34	214.1	236.71	308.89	171.86	244.59	153.3
LPC 20_0	59.72	74.91	89.11	82.3	71.43	110.81	127.43	65.8	90.2	111.01	109.14	71.88	55.17	84.01	57.55	53.71	77.64	67.04	94.63	84.52	78.15	79.04	92.12	73.07
LPC 20_3	483.47	852.93	1100.93	1121.82	620.42	724.8	878.52	1063.4	998.56	817.09	1020.37	1018.93	639.67	807.87	777.09	1378.24	964.37	680.48	1416.98	829.24	1186.27	668.1	982.21	474.19
LPC 20_4	1262.26	1447.92	1808.69	1932.13	1611.74	1548.84	1768.56	2116.76	1486.94	1654.75	1833.77	1632.09	1323.7	1652.37	1347.48	1741.4	1838.56	1673.46	2121.88	1740.16	1918.52	1485.56	1711.22	1002.31
LPC 20_5	49.7	82.77	148.98	75.37	79.28	82.36	137.82	102.09	133.15	65	526.69	205.55	40.25	106.06	74.39	164.59	104.69	70.93	104.01	206.24	173.86	75.28	135.54	60.52
LPC 22_1	44.63	74.71	149.09	160	46.68	61.32	102.09	113.06	82.58	100.82	104.3	57.79	60.46	129.86	103.86	143.07	95.91	76.22	122.27	82.48	162.65	76.43	71.42	38.14
LPC 22_4	41.02	81.79	98.74	98.38	58.57	61.38	91.6	115.06	63.61	103.16	96.64	78.8	56.2	82.78	52.78	101.52	89.55	75.16	161.57	63.81	96.51	74.12	91.53	44.81
LPC 22_6	317.37	584.54	493.03	657.57	437.47	476.18	520.69	886.91	371.69	511.31	766.98	581.52	305.99	521.67	264.63	422.02	555.76	483.42	926.16	427.54	597.04	519.27	535.41	261.5
LPC 24_0	40.22	43.1	51.53	61.57	41.03	60.34	70.23	35.67	46.32	58.76	75.14	60.57	40.25	47.02	39.87	42.15	44.79	50.09	43.18	55.94	48.32	51.91	59.42	64.38
LPC O-16_0	141.14	198.45	234.73	156.71	144.28	212.54	195.38	151.68	443.56	195.9	256.05	267.32	137.42	195.11	197.76	170.92	165.22	164.96	201.38	205.09	211.98	214.98	218.71	187.71
LPC O-18_0	284.12	357.05	394.23	284.74	266.61	306.41	324.44	268.32	588.6	457.84	474.8	479.85	210.13	334.02	260.5	266.79	318.78	255.62	350.55	319.94	346.32	546.45	411.89	252.51
LPC P-18_1	2.49	1.52	5.93	3.62	1.64	1.76	4.3	3.26	4.78	2.8	8.18	2.43	1.52	3.43	2.53	2.97	3.5	2.05	2.72	3.55	3.7	2.57	4.62	0.97
LPC P-20_0	10.31	19.17	19.79	15.93	14.11	17.98	21	17.76	23.17	22.29	24.97	16.55	5.47	16.36	12.85	13.47	20.21	17.61	25.18	15.79	17.45	23.26	20.09	8.45
LPE 12_0	2.43	1.83	2.38	1.7525	1.89	0.98	0.59	0.78	1.72125	2.10333	1.79167	1.94	2.89	1.37667	1.87	0.58	1.49571	1.55	1.42	1.495	3.13	1.26	1.76556	2.06
LPE 16_0	219.44	153.21	175.9	257.73	240.68	227.66	314.79	234.36	171.78	327.88	239.14	365.27	208.15	398.06	197.67	311.96	199.8	197.35	249.66	181.3	252.6	323.6	258.29	351.96
LPE 17_1	1.67	2.51111	1.79778	1.73375	0.53	3.22	2.95	1.27	2.11125	2.10571	2.97	2.19111	1.77375	6.91	3.05	1.68	0.49	2.23444	4.78	0.34	0.51	0.78	1.85	1.65
LPE 18_1	4.24	2.49	10.01	9.72	3.63	8.14	8.5	6.75	4	8.91	4.51	9.5	6.95	6.29	8.44	8.12	4.03	1.41	11.17	4.78	8.03	10.57	5.76	6.58
LPE 18_2	1.34	0.93	1.5	1.97	0.5	0.71	1.12	1.42	1.80286	0.63	0.5	1.72667	0.66	0.34	0.51	1.555	1.45625	0.3	1.42111	0.34	0.41	0.87	0.47	0.35
LPE 20_0	10.13	3.8	9.57	10.45	7.81	6.76	7.67	11.89	3.74	7.15	7.41	9.49	8.21	7.11	6.51	9.24	9.67	7.33	4.98	6.287	9.69	8.28	6.68	6.86
LPE 20_1	11.78	9.01	15.76	20.27	25.15	34.43	28.02	16.6	12.86	19.38	10.11	33.2	45.06	14.5	32.05	38.66	26.23	7.84	21.38	23.33	42.82	46.66	24.19	24.63
LPE 20_2	5.13	8.31	5.46	3.14	7.12	9.47	11.42	7.51	6.16	9.02	7.04	9.93	10.53	5.91	10.94	9.17	9.69	7.28	11.42	2.84	7.21	10.09	9.25	7.94
LPE 20_3	54.2	85.96	53.47	62.59	39.5	42.8	75.2	49.53	38.14	50.03	57.09	63.06	44.53	120.55	79.51	69.53	35.97	46.67	55.49	45.23	46.65	57.15	63.48	67.31
LPE 20_4	260.06	233.34	279.28	216.19	225.63	279.38	289.12	246.07	253.06	286.26	257.54	287.24	300.14	272.61	277.51	354.06	256.36	239.78	271.53	206.33	310.58	341.16	296.04	272.05
LPE 22_0	8.38	4.28	10.5	8.71	7.01	7.9	11.73	5.49	5.58	8.54	8.41	9.02	5.96	7.29	7.32	6.4	9.25	9.01	8.5	7.24	10.91	10.11	12.46	7.33
LPE 22_1	1.41	2.08	1.54	1.87	1.59	1.556	0.67	1.52	1.88333	1.95167	1.69667	0.69	1.36625	1.25	1.18	1.33	2.15	1.7	0.74	1.44	1.62222	2.33	0.53	0.44
LPE 22_3	3.23	2.7	1.32	2.29	1.47	3.58	4.44	2.813	0.77	2.64167	0.71	0.7	7.3	2.87	7.34	0.59	4.52	2.37	1.32	2.99	1.73	1.85	3.79	2.97
LPE 22_4	48.47	49.55	36.81	40.61	20.27	54.58	63.5	41.66	26.47	50.39	36.98	40.39	69.9	88.3	75.51	59.98	53.05	27.05	75.95	46.32	64.33	58.99	49.21	46.64
LPE 22_5	69.39	68.56	53.7	45.7	39.69	58.2	70.59	54.04	55.16	88.92	60.19	56.2	52.52	97.08	70.93	63.7	59.09	47.53	66.28	34.96	68.48	66.48	61.17	52.65
LPE 22_6	353.98	263.88	256.21	203.12	177.74	244.98	273.81	206.05	240.47	277.22	293.72	219.77	241.17	308.96	195.9	297.6	240.83	306.87	217.93	162.04	249.52	283.16	250.9	234.09
MAG 16_0	638.5	781.3	535.85	697.33	930.57	840.86	957.32	672.06	747.29	868.49	647.78	833.14	567.31	860.64	804.24	955.74	801.45	2193.91	791.19	660.88	710.91	710.73	1085.67	682.71
MAG 16_1	3.7	17.07	7.59	3.82	2.28	15.57	5.24	12.54	8.16	2.73	3.78	16.29	4.4	10.91	11.27	11.57	7.42	8.3	5.14	7.26	2.2	5.25	5.65	1.89
MAG 18_0	556.87	590.71	502.62	762.46	579.24	692.45	756.14	471.58	467.42	832.65	441.37	520.89	600.05	833.74	679.23	813.41	810.32	599.56	727.56	597.12	602.31	601.15	526.76	580.81
MAG 18_1	24.97	24.46	14.8	30.11	24.67	18.62	34.96	20.77	18.28	26.09	21.11	28.36	12.27	34.19	30.16	18.84	29.98	31.28	14.65	25.21	20.91	18.23	46.47	25.14
MAG 18_2	12.59	9.93	37.58	13.11	5.43	11.58	9.24	23.16	3.56	4.01	5.84	4.53	15.27	14.8	22.32	11.17	9.64	1.22	10	4.49	7.78	11.69	26.44	15.57
MAG 20_4	6.98	8.36	4.26	9.59	4.53	1.92	4.42	1.83	2.66	4.63	1.25	2.88	2.19	5.04	4.44	1.36	2.54	1.19	2.64	4.62	2.96	9.85	7.72	7.06
MAG 22_5	66.42	53.66	38.83	59.78	62.42	62.01	77.31	48.43	48.56	72.95	65.33	61	44.14	72.06	53.96	77.3	67.15	80.22	65.81	55.58	65.11	79.81	80.5	60.57
PA 18_0-20_3	125.76	112.68	257.4	387.17	141.26	337.14	289.4	290.07	441.05	203.91	57.2	264.47	175.715	423.45	167.24	177.22	128.86	230.48	190.63	252.35	157.56	332.46	130.84	106.25
PC 16_0-22_3	89.9	87.97	120.07	134.58	141.69	158.67	147.41	189.63	115.63	47.42	182.84	244.48	183.46	81.28	75.65	265.82	127.94	62.5	218.78	127.34	198.23	192.73	138.99	93.73
PC 16_0-22_5	5007.77	5142.92	3780.61	3730.68	6259.15	4471.6	3004.37	4312.36	5607.84	4132.39	9229.78	6360.55	5574.35	4657.3	2029.46	6176.32	4597.08	3656.79	5035.91	3617.2	4891.07	5361.84	5141.03	4932.49
PC 16_0-22_6	14308.8	9562.15	5587.65	8911.34	13883.7	7193.01	6993.03	7446.62	6999.79	6286.07	17813.2	13385.5	13511.9	5061.03	4649.45	8145.55	10476.5	8113.62	7141.9	4994.16	10344	13896.4	5060.23	7638.03
PC 16_0e-16_0	2371.86	2491.32	2701.88	3218.27	3696.25	3577.71	2857.11	2951.91	2886.22	2915.57	3621.84	3104.07	2597.67	2859.74	2242.24	2737.28	2732.55	3490.36	3180.81	2629.03	2987.7	3436.82	3044.97	2678.33
PC 16_0e-16_1	1741.21	1784.06	2198.57	2505.7	3018.71	2685.99	2486.09	2054.04	1873.2	1761.61	2789.75	1761.9	1875.17	2088.04	1415.15	1962.25	1933.2	2576.64	2404.72	2688.65	2386.11	2101.66	2037.85	1840.71
PC 16_0e-18_0	1236.2	1646.43	1339.65	1323.8	1423.06	1677.68	1318.36	1305.71	1786.93	1716.95	1689.28	1849.93	1092.1	1711.35	1199.38	1466.99	1738.39	1644.78	1613.75	1488.17	1552.43	2210.32	1684.27	1617.6
PC 16_0e-18_1	5379.37	5272.3	6475.8	6027.97	6411.89	7753.22	5995.78	5458	7370.55	4991.22	7185.62	6839.29	5221.94	6334.03	5888.07	6634.82	7050.06	6398.29	7123.37	7064.81	6415.32	6863.31	6377.19	6290.6
PC 16_0e-18_2	7232.94	7600.29	10946.8	10900.5	8772.93	12266.4	9916.32	5818.14	10155.9	10299.4	9433.08	10305.7	7775.65	11544.1	10778.8	9656.85	11849.7	11756.2	12973.6	10829.2	11357.2	12276.1	9546.01	12267.8
PC 16_0e-20_1	1857.52	2546.58	2420.69	1940.31	1598.13	2414.52	1878.71	2011.38	3038.48	2459.24	3081.84	3193.82	1721.36	2729.08	2123.6	2224.13	2570.28	2356.35	2250.15	2437.09	2113.79	3341.42	2601.94	2449.29
PC 16_0e-20_2	6036.86	6626.56	6227.55	7101.71	5436.56	6683.05	6208.08	5023.06	6745.12	7947.58	7396.01	7487.43	4909.44	7351.22	7010.36	5624.94	6239.78	6637.67	6343.53	7085.29	7888.5	10920.8	8034.24	6089.37
PC 16_0e-20_4	13854.6	12135.6	19280.3	17025.3	20566.7	23471.3	19280	11759.5	14062.2	15878.3	19532.4	17144	14943.8	18434.3	17210.1	17272.2	20375.2	26979.1	22081.1	18725	18311.5	18786	17579.6	16953.9
PC 16_0e-22_5	21121.5	21855	23985.4	25412.7	31072.1	31932.1	26032.7	19829.1	18742.2	23554.1	25726.8	24249.8	21564.1	23586.8	19282.8	18603.1	29564.2	28799	30271.3	21437.9	23141.5	22675.6	26898.9	22873.7
PC 16_0e-22_6	6539.37	7603.67	9436.56	8661.69	7644.58	10569.8	8412.32	5352.06	6887.3	7585.73	12444.9	10210.2	5859.98	8412.56	7255.31	7202.65	10979.4	9199.74	9792.15	9457.44	9455.67	7659.04	9707.4	9349.73
PC 16_0p-16_1	349.22	274.45	359.99	375.77	349.71	236.06	345.77	243.22	252.57	216.12	582.44	354.17	342.86	282.56	266.31	349.24	245.57	533.48	345.12	473.08	332.13	330.1	451.37	313.54
PC 16_0p-18_0	4436.57	5624.82	5920.38	5294.12	6015.93	7703.62	5047.87	4625.92	6411.61	5219.97	6497.38	6654.66	4419.98	5739.13	5559.45	5730.17	6404.46	7107.51	6807.24	6603.54	6002.16	6312.12	5731.58	6211.55
PC 16_0p-18_1	8635.78	8247.11	12172.9	11379.1	7838.2	12374.8	10329.2	6615.14	10213.2	10335.2	9656.31	11848.8	7511.5	12329.6	9955.01	11431.9	11653.4	12896.2	12626.4	10939.4	11785.8	10656.4	11256.6	12893.2
PC 16_0p-18_3	139.56	99.6	162.07	124.54	126.48	205.68	127.14	83.67	177.56	91.78	264.03	147.91	63.75	104.49	106.46	117.75	201.85	215.79	85.12	132.96	98.45	213.9	180.95	200.17
PC 16_0p-20_0	1854.29	2677.79	2382.33	1885.05	2120.63	2233.54	1892.84	1871.53	3162.56	2684.32	2217.91	3269.33	1669.18	2663.71	2133.22	1969.16	2664.94	2241.79	2530.14	2467.64	2362.4	3031.81	2676.17	2321.11
PC 16_0p-20_1	5919.57	4929.55	7095.45	6996.55	5931.34	6775.58	6079.07	5233.96	6379.97	8157.78	8570.01	7379.54	5573.81	6675.14	6063.59	5394.3	7312.56	7464.76	5483.78	6652.38	7421.41	9659.56	7290.66	5997.02
PC 16_0p-20_2	5296.29	5059.35	8186.9	6932.25	6208.32	8674.42	7132.76	4480.28	6083.71	6574.84	7210.01	6642.65	5290.99	8056.34	7285.72	7355.17	7889.53	8705.93	8899.71	7308.34	7331.63	7928.96	7831.12	7357.54
PC 16_0p-20_4	13398.2	14429.3	21387.8	19885.1	22366.9	21826.4	17240.3	11511.9	14827.1	15854.8	22119.5	18876.4	13222.3	19395.6	17461.4	14081.3	22203.4	23273.6	18379	20687.5	18619.8	19410.2	17965.9	18944
PC 16_0p-22_6	3123.04	4005.21	4748.89	3078.04	3636.56	3624.29	3600.51	2160.78	2702.65	3331.89	7753.92	5016.68	3185.2	3969.12	2292.55	2758.73	3633.35	3870.57	3682.52	3395.43	4342.91	2721.53	3483.77	2848.77
PC 16_1-20_2	8.34	38.54	9.84	29.28	12.405	8.37	2.38	5.68	25.72	19.16	13.653	12.95	9.608	13.902	8.38	12.2789	7.57	5.99	8.25	12.025	28.8	17.14	18.84	15.44
PC 16_1-20_4	202.04	358.52	271.86	373.7	211.82	240.62	200.61	228.53	641.22	281.2	251.46	359.91	479.07	193.7	354.65	172.23	622.17	277.87	402.54	314.11	679.88	477.99	233.43	279.77
PC 18_0e-16_0	1116.34	1661.86	1488.07	1392.86	1391.42	1703.5	1271.24	1298.1	1630.51	1644.2	1672.23	1838.29	1058.92	1667.07	1314.15	1375.4	1708.09	1778.92	1627.67	1533.47	1396.56	2205.59	1674.44	1667.2
PC 18_0e-16_1	4590.36	6182.31	6516.45	5762.31	6154.89	7843.95	6148.65	5505.55	7222.66	5658.19	7501.05	7043.16	5170.82	6324.13	5156.63	6463.5	6145.67	6495.6	6784.81	6354.19	6004.4	7105.46	7096.75	6622.7
PC 18_0e-18_0	159.02	338.08	214.89	166.37	257.75	236.51	210.5	267.28	391.23	356.48	360.27	464.97	183.96	330.41	107.65	205.52	293.73	355.07	348.88	280.28	262.96	391.76	325.31	300.75
PC 18_0e-18_1	1555.8	2304.11	2229.25	1590.16	1966.57	2218.49	1993.55	1747.42	2921.99	2554.6	2920.5	2676.43	1720.2	2376.52	1712.77	2295.73	2369.93	2355.62	2220.22	1946.42	2264.92	3396.04	2388.11	2099.19
PC 18_0e-18_2	5754.08	6449.99	7413.9	6749.56	6048.92	6755.74	6188	5258.66	7773.55	8163.13	8176.04	7252.72	6170.53	7178.08	5900.19	5814.6	6143.59	6564.01	6632.63	6860.07	7641.95	9364.18	6825.83	6088.96
PC 18_0e-18_3	5798.14	5939.97	9171.8	7899.88	7085.87	9375.78	7836.76	4924.83	6100.18	7799.87	8015.32	7333.49	6123.35	8256.52	8220.08	8048.01	8598.11	9394.78	9330.6	8928.9	7731.35	8967.86	7941.48	7584.05
PC 18_0e-20_4	12047	13007.2	13419.6	13243.9	16275.8	17193.4	13566.4	11694	11178.1	10333.3	15143.1	12469.8	12124.8	15272.3	12792.4	12464.6	15622.5	18214.5	16480.3	15867.2	14730.4	17017.8	17165.8	12010.3
PC 18_0p-14_0	3925.63	4429.76	4800.14	5740.37	4762.05	4806.86	5074.95	4223.35	3930.47	3745.21	5826.23	3612.63	3559.89	3355.24	3207.69	4204.84	4347.19	4247.63	4836.48	4455.15	4665.82	4747.33	4034.02	3836.09
PC 18_0p-14_1	349.65	279.31	231.49	409.13	350.63	265.92	352.4	220.17	252.47	233.48	554.33	228.17	289.26	270.19	259.53	423.81	437.37	575.28	335.09	380.56	235.81	377.78	378.98	348.24
PC 18_0p-16_0	5064.73	6514.44	6690.28	6519.43	6698.16	7103.82	6510.16	4994.53	7396.38	5289.02	7377.89	7603.41	5616.2	6840.51	6189.81	6808.73	6754.61	7096.61	7421.23	7571.22	5410.66	6766.72	6646.86	6759.17
PC 18_0p-16_1	7597.25	7818.02	12178.1	10181.8	9360.43	10892.2	10071	6162.48	10412.5	10340.2	10681.8	10290.4	8264.27	12014.3	11143.6	9584.03	10637	11334	12492.8	12442.6	10110.7	11816.3	11296.7	12470
PC 18_0p-18_0	1668.07	2646.71	1971.16	1915.57	1978.46	2526.92	1977.84	1985.74	3109.76	2713.7	2417.71	3144.7	1704.57	2454.26	2165.77	2168.34	2524.03	2432.94	2456.13	2538.55	2428.27	3758.05	2748.97	2241.31
PC 18_0p-18_1	5201.46	5726.83	7518.05	6694.97	6154.08	6885.01	5275.16	5261.86	7886.59	8414.42	7316.91	6397.86	5354.57	7970.59	5924.19	5664.32	6372.29	6317	6625.17	7965.19	6489.88	8953.91	6870.64	5495.7
PC 18_0p-18_2	5571.67	5906.17	8704.84	7396.01	6862.2	9334.33	7905.93	4836.73	6624.73	7745.08	7729.32	6907.74	5931.14	7731.41	7876.28	7790.94	8712.54	10164.1	9794.08	7740.62	8226.23	8566.87	7739.57	7206.76
PC 18_0p-18_3	14659.8	13154.4	19315.6	17075.8	19489.8	21450.3	17095	12451.6	14469.3	16169.8	19146.8	16935.9	15434.7	20008.6	18002.5	19714.5	21687	30984.5	21482.1	19916	18649.8	18408.5	17899	16758
PC 18_1-20_3	982.15	1235.41	1110.24	1059.36	1137.87	1319.13	808.56	569.05	2390.76	408.13	928.86	930.47	1318.19	309.05	475.59	1567.63	1565.09	825.51	940.53	1319.89	900.76	977.33	1446.77	1345.01
PC 18_1e-16_0	4386.02	6413.37	6285.53	6335.99	5747.23	7884.13	6544.14	5334.23	6376.37	5948.72	7554.4	7138.09	4940.47	6208.39	6349.21	6149.68	7166.27	6348.8	7083.12	6748.61	5724.21	6768.03	6262.88	6400.26
PC 18_1e-18_0	1827.09	2624.74	2515.58	1956.22	2176.04	2479.03	1988.63	1702.8	3324.16	2812.06	2360.42	3118.33	1727.11	2736.18	2123.24	2117.16	2601.59	2356.79	2307.81	2585.29	2217.08	3472.76	2662.96	2341.49
PC 18_1e-18_1	5053.11	6177.68	7891.35	6797.55	6206.96	6889.91	5963.23	4773.09	8120.17	8006.29	8520.37	7368.85	5479.2	7246.14	6676.87	6823.77	6290.1	6666.23	6643.46	7166.32	7271.26	9049.31	7952.72	5929.06
PC 18_1e-18_2	5662.87	5861.33	8725.8	7694.4	6862.3	9472.47	7646.72	5001.57	6607.53	7464.63	7538.77	7477.02	5805.61	8223.05	8417.47	7577.8	8080.68	10114.6	9106.6	8224.29	8027.06	8526.27	8296.74	7200.69
PC 18_1e-18_3	13179.3	13632.3	17891.7	19625.1	20326	22948.6	16564	12720.4	13635.5	15336.6	18434.9	16109.2	15511.6	18163.3	17733	17653	20416	25660	19436.9	19200.2	17355.8	17953.3	17447.1	16653.4
PC 18_1e-20_4	22008	23124.5	27165.1	24922.4	31627.8	28927.4	25779.7	20138.8	17653.1	20070.2	25310.5	21989.7	21561.8	23923.4	21029.2	19201.3	26731	29968.2	28088.9	26130.4	22712.4	21978.3	26170.7	20194.5
PC 18_2-20_3	966.72	930.53	711.36	1198.65	828.79	712.77	1046.09	600.65	981.39	736.71	776.88	970.35	1449.04	766.59	1145.11	1486.65	1229.57	567.99	639.47	786.16	1363.4	903.03	1322.11	851.84
PC 18_2-20_4	2935.42	1354.9	1951.56	2649.71	2943.79	1210.81	1413.52	1343.24	3462.69	1980.5	2430.07	2450.3	3652.76	2006.34	1778.17	3649.12	3034.21	1207.86	3113.48	1813.8	4013.51	2241.87	1956.68	2395.97
PC 18_2e-12_0	6.61	18.77	8.973	6.63	11.66	2.96	39.57	9.185	12.467	0.58	11.181	16.12	9.677	34.01	3.84	12.128	14.22	5.35	25.71	12.69	13.42	0.11	22.76	8.748
PC 18_2e-16_0	6886.12	8055.09	11883.5	11204.6	7546.61	11292.8	10079.9	6260.2	9971.23	9965	10088.5	10982	7091.09	10881.1	12147.6	11829.3	11626.7	13176.7	12044.6	12539.3	11781	12769.5	10580.1	10556.3
PC 18_2e-16_1	4428.12	5622.12	7937.13	8308.11	6166.08	11453.2	6465.19	4017.27	5235.48	7305.11	5454.81	5692.48	3935.06	5868.55	5937.94	5870.06	6455.6	6831.79	5192.73	5552.88	5834.15	10569.4	9378.83	6823.45
PC 18_2e-18_0	5169.03	5644.95	7376.72	6920.2	6121.78	7112.9	5860.48	5025.46	7455.86	8664.56	8292.39	8549.91	5562.61	7014.8	6065.57	5752.86	7159.56	6942.03	6377.97	7662.11	6515.33	9367.66	7284.72	6940.74
PC 18_2e-18_1	5783.6	6106.25	8573.73	7840.41	6864.89	9567.09	7479.87	4773.95	6096.44	7604.01	8027.52	7263.46	6053.76	7996.62	8039.22	8014.12	8283.06	10093.1	8975.97	8059.33	8120.45	8719.09	8019.81	7480.73
PC 18_2e-18_2	13559.4	13538.6	18822.6	15543.3	19520.5	22328.9	15744.6	12628.9	16675	15534.7	18524.3	15776	14888.3	16899.7	16958.2	17222.1	20136.5	25684.7	20508.7	19576.2	17276.8	18070.6	18907.2	15283.4
PC 18_2e-18_3	16049.7	15960.4	21715	21363.3	26000.7	22997	20415.2	13807.5	16013.2	18600	23268.7	19676.3	16127.9	20052.6	18849.9	18938.8	24480.7	26146.2	19475.8	22966.8	21244.4	18944.8	21517.3	21172
PC 18_2p-16_1	96.84	100.65	130.11	119.03	114.8	166.64	72.82	103.45	89.28	131.03	185.83	173.56	60.48	107.78	108	124.88	207.35	320.51	63.26	145.99	131.31	196.37	223.56	151.94
PC 18_2p-18_0	5618.31	6200.85	8715.24	7482.12	6861.71	9497.03	7666.3	4836.76	6194.62	7342.4	7725.44	7386.63	6201.34	7956.8	8304.3	7940.45	8064.96	9095.43	8869.83	7946.69	7851.1	8605.45	7923.49	7021.12
PC 18_2p-18_1	14355.5	15465.5	19294.4	16837.2	19142.3	21603.1	15620	12906.3	13172	15670.1	21929.4	19066.3	18012.9	16409.9	18021.1	17700.8	20903.9	25717.4	21718.3	18708	17527.9	18956.1	17010.6	16715.5
PC 18_2p-18_2	14426.3	14731.6	20522.3	22399.6	23541	21701.4	18333.8	13017.8	16112.3	17385.3	23742.1	18644.2	15184.6	19359.5	18404.2	15320.6	22054.6	24124.8	18425.3	21424.7	19462.9	18220.7	19356.9	18218.1
PC 18_2p-20_3	10197.1	10160	11641.7	13147.9	16547	13165.3	11811.3	8000.77	8111.96	10416.8	16519.4	16518.5	9766.67	12827.1	11430.3	10922.4	15852.3	15709.8	13741.2	14785.1	8570.56	11057.7	13723.2	14738.5
PC 18_2p-20_5	18985	25087.1	25201.8	24423.8	28619.6	24412.3	35734.1	19644.7	35072.8	36242.3	33274.4	27380.1	23506.8	28800.4	31782.5	34618.5	24936.4	22867.1	34724.8	25015.9	28342.9	22477.3	28808.8	25437.8
PC 20_0-20_3	64.05	66.84	62.09	42.08	65.46	84.8	107	25.54	102.85	119.8	131.74	63.98	61.72	83.74	58.59	89.7	127.84	75.08	82.61	125.03	71.33	58.58	114.48	113.65
PE 14_0-22_5	4.505	3	0.21	5.91	6.281	3.41	6.94	4	1.16	10.01	15.83	19.63	5.78333	5.40333	3.64	12.29	3.34	5.607	53.61	1.63	6.6	14.72	13.26	4.99
PE 16_0-18_2	1817.98	228.49	310.46	521.6	583.41	102.58	80.96	49.86	3901.65	99.72	2668.95	345.45	2152.26	85.74	87.49	3327.25	294.53	70.74	216.25	75.15	2017.41	268.63	493.34	836.28
PE 18_0-20_5	75.64	3.57	10.49	10.42	82.07	21.62	16.563	4.6	85.1	1.95	279.95	37.99	7.16	15.8788	18.25	21.61	25.975	11.3489	37.55	18.9112	62.75	19.41	20.8287	94.86
PE 18_1-18_1	1143.47	426.41	292.91	977.21	1622.98	262.85	369.13	284.1	2712.74	231.73	1994.09	591.96	2799.4	521.12	219.61	2471.9	1510.51	275.4	957.39	490.61	4072.34	599.41	937.4	2200.88
PE 18_1-18_2	1111.35	3310.06	1058.93	3418.19	774.29	1007.48	670.52	696.11	1283.14	1777.73	1119.89	1513.48	808.13	988.9	639.56	1718.67	6966	438.18	3627.18	741.23	1791.11	2633.69	5288.41	997.01
PE 18_1-20_4	206.15	30.64	53.15	50.26	104.86	38.38	10.2	56.34	105.67	15.37	85.56	45.12	93.33	41.17	83.1	41.24	43.86	42.38	14.1	14.86	68.33	26.8	76.92	91.2
PI 16_0-18_0	67.3	123.47	73.67	53.96	100.18	107.13	69.36	74.16	100.2	156.81	116.87	141.96	138.05	179.81	86.63	90.18	200.78	88.61	163.81	76.78	68.16	107.77	159.62	95.84
PI 16_0-18_1	813.69	1466.06	1302.58	1078.59	1660.68	1514.87	1068.32	912.98	2141.32	1477.01	1805.28	1484.22	1634.68	1550.13	1528.3	1305.6	2548.08	1468.43	1640.11	1145.67	1713.9	1240.89	1916.9	1213.24
PI 16_0-18_2	1786.18	2161.98	3336.99	2397.52	1557.82	1688.58	3169.19	1846.34	3065.35	3653.9	3148.93	2783.16	2498.12	3640.54	2429.54	1266.85	2226.29	1618.5	1878.89	1546.32	2343.94	1348.42	2480.17	2551.03
PI 16_0-20_1	3.19	16.26	7.9	2.46	5.54	24.9	14.66	4.73	8.76	11.82	6.41	6.07	12.67	21.99	17.36	14.2	29.11	8.07	27.15	6.29	13.02	13.53	13.08	4.2
PI 16_0-20_3	203.1	531.59	370.19	262.13	279.97	269.37	366.35	178.24	437.42	239.4	259.01	579.15	433.77	219.81	309.65	343.89	386.48	188.49	292.9	118.77	254.1	190.77	278.72	203.28
PI 16_0-20_4	1615.86	2582.68	2787.45	658.17	1993.67	1637.76	2583.45	822.52	5082.23	1886.73	1642.05	1562.52	2144.56	1837.04	1357.73	1072.05	1826.29	721.27	1604.23	1069.92	910.23	745.79	1286.69	1582.63
PI 16_1-18_0	67.59	249.26	176.42	57.7	101.76	170.63	85.75	66.08	243.9	170.81	173.16	277.77	95.11	146.26	96.66	175.67	175.66	100.61	141.79	111.25	225.01	129.22	136.89	118.19
PI 16_1-18_1	22.25	53.9	28.87	10.69	48.49	60.38	16.96	13.73	107.83	60.86	42.15	54.8	28.39	36.39	31.76	18.36	44.7	37.74	73.62	45.68	109.99	40.09	44.24	55.95
PI 16_1-18_2	6.17	22.89	11.95	18.34	7.07	5.16	3.61	8.11	29.39	9.06	2.46	9.09	8.14	9.96	10.23	4.76	25.67	4.84	6.78	6.93	13.34	21.61	17.15	2.59
PI 18_0-18_0	62.57	149.42	118.37	108.73	192.65	238.6	141.64	74.8	137.96	204.44	137.26	118.4	156.1	204.99	192.03	146.6	200.25	188.73	213.28	123.65	184.73	151.39	140.91	119.43
PI 18_0-18_1	1421.07	1320.73	1077.54	1103.14	1852.36	2626.62	1216.56	911.98	1400.32	2908.92	1810.43	2229.4	1710.63	2548.83	1033.72	1246.72	1840.41	1601.62	2725.97	1274.06	2118.58	1365.83	1963.64	1559.37
PI 18_0-18_2	4080.6	8707.4	5299.29	5575.57	5692.01	3936.56	7885.27	4912.21	11352.5	16589.5	7731.58	7423.18	6118.75	10592.9	5116.51	3991.38	9494.6	3953.52	4724.75	5232.64	9748.92	9463.11	4018.37	6685.11
PI 18_0-18_3	25.13	45.29	62.55	28.74	12.75	30.09	49.92	21.14	117.4	50.27	47.63	73.77	21.02	45.75	23.1	21.85	49.84	10.51	31.07	25.81	40.92	45	41.6	15.51
PI 18_0-20_2	271.39	408.54	340.85	309.38	265.75	256.89	322.56	214.3	429.93	466.05	310.2	471.19	317.29	306.78	397.93	206.83	344.02	213.53	335.07	210.38	289.02	236.16	229.56	254.51
PI 18_0-20_3	2337.35	2872.39	2344.09	2411.25	2308.69	1938.52	2463.07	2083.69	3371.18	3420.25	2569.44	3294.23	3119.16	2303.6	2331.24	1532.26	3630.28	1863.33	2591.13	2204.48	3429.78	2220.96	2177.76	2295.25
PI 18_0-20_4	10022.1	13279.3	8764.21	9068.21	9134.09	10237.9	9837.96	9134.29	9795.23	11032.9	9040.42	8934.71	12426.9	10454	6775.71	5409.51	10386.6	8429.02	11001.4	6748.63	13404	8837.53	7113.28	7801.28
PI 18_0-20_5	51.28	70.46	56.54	39.55	45.83	48.94	77.04	44.75	151.8	86.54	88.7	76.3	62.75	67	33.81	46.25	75.74	38.19	56.62	54.99	66.48	51.64	48.85	54.24
PI 18_0-22_4	83.92	133.21	118.79	79.43	118.88	82.09	80.07	85.03	101.53	126.77	84.37	101.63	93.16	138.34	87.91	80.53	72.92	97.03	142.26	76.66	95.43	69.64	94.04	99.16
PI 18_1-18_1	702.11	922.88	751.7	700.02	1506.16	2195.36	1808.4	621.76	1193.68	2702.35	948.06	878.84	1904.62	724.2	984.21	1171.65	2901.05	1259.58	2841.55	980.78	2065.53	1091.88	1724.4	1566.98
PI 18_1-18_2	885.04	570.39	1045.86	848.63	1100.54	962.26	719.18	607.38	2222.44	2525.78	1169.47	871.54	1389.95	1894.4	808.78	596.95	1975.29	892.86	1621.89	1108.28	987.25	930.95	1246.24	1345.49
PI 18_1-18_3	0.08	3.6	6.31	8.63	12.15	6.44	6.84	7.23	36.46	16.15	6.25	14.07	4.17	16.48	2.69	4.88375	3.1	0.75	7.42	7.11	13.22	4.68	12.74	3.12
PI 18_1-20_3	70	80.63	95.99	58.05	80.38	109.21	75.01	25.62	268.42	168.41	68.76	87.3	82.44	76.07	99.63	55.22	146.82	90.33	110.85	84.07	125.46	104.15	90.72	71.86
PI 18_2-18_2	101.02	109.08	230.57	228.32	89.55	96.73	99.21	83.8	182.62	666.13	123.72	108.32	89.17	224.25	99.32	138.95	133.73	60.52	106.12	105.05	132.61	127.67	176.94	99.39
PI 18_2-20_1	4.39	7.13	6	10.7	5.92	26.37	15.46	5.6	5.26	11.58	6.46	5.56	3.42	16.28	10.65	4.21	11.54	22.91	14.94	16.74	9.61	12.52	4.21	5.57
PI 20_0-20_4	10.79	11.8	8.21	16.17	6.32	11.03	23.12	12.33	14.39	16.19	16.73	8.53	11	10.24	3.69	9.16	12.21	7.1	11.48	7.01	3.32	7.58	11.38	10.95
SM d18_1-12_0	75.47	133.18	210.67	104.93	113.3	78.42	271.42	86.5	180.49	102.82	172.72	298.65	74.26	145.65	307.12	111.93	149.36	86.25	204.64	92.28	234.31	134.77	198.66	167.77
SM d18_1-16_0	6100.98	6402.61	6314.88	6338.38	7066.67	6705.67	6581.66	6014.3	5723.17	7370.74	6248.68	6762.72	6552.33	6516.7	6255.12	6603.87	6697.06	6670.69	6935.79	6479.86	6709.37	7123	6826.83	6489.08
SM d18_1-16_1	1373.2	1245.77	1432.14	1378.48	1589.63	1652.64	1788.3	1237.58	1507.48	1903.27	1616.91	1810.45	1493.76	1221.63	1347.71	1406.62	1575.89	1494.62	1709.92	1393.07	1573.58	1557.29	1772.38	1670.11
SM d18_1-17_0	826.31	1059.74	904.24	869.67	1086.42	919.86	918.59	721.41	866.33	1455.87	804.68	1267.96	849	1034.45	881.02	814.21	1023.17	1046.96	1055.86	923.18	1086.82	1651.9	1030.84	991.23
SM d18_1-18_0	4265.46	5220.31	4674.92	4482.25	5587.3	4823.56	5013.54	4824.08	4370.22	5754.96	3723.42	5775.85	5040.31	5019.42	4912.11	4597.96	5244.58	5220.7	5669.99	4437.6	5479.36	5559.47	4633.8	5010.48
SM d18_1-18_1	4272.94	4646.93	4523.24	4446.48	5276.29	4855.13	4862.37	4464.36	4738.28	5558.88	4160.66	5503.48	4938.67	4613.12	4643.36	4309.82	5118.66	5092.49	5574.04	4462.21	5445.23	5094.21	4745.34	4847.65
SM d18_1-18_2	322.06	312.74	390.16	390.77	476.5	453.11	401.59	363.9	419.86	552.29	341.76	509.45	417.17	419.36	370.19	324.18	539.75	485.05	529.63	484.01	664.44	426.64	410.57	470.01
SM d18_1-18_3	55.16	45.11	59.41	45.52	53.8	45.77	74.11	51.04	60.55	68.65	57.38	70.56	44.44	51.07	48.09	35.23	56.22	45.6	41.85	59.64	92.34	58.73	61.95	67.87
SM d18_1-20_0	6762.12	6792.75	7032.09	7322.24	7056.61	6836.81	7444.19	7040.03	6574.82	7773.16	6428.03	7247.27	7516.42	7486.92	7271.26	7487.32	7294.22	7268.95	7199.4	7016.75	7691.62	7155.34	7630.1	7017.19
SM d18_1-20_1	2613.11	2980.24	2768.78	2664.33	3225.48	3366.16	3598.44	2584.31	2987.45	4308.81	2713.25	3712.01	3181.99	2690.69	2838.1	2508.5	3232.43	3142.73	4096.91	2858.05	3523.89	3763.83	3137.3	3092.46
SM d18_1-20_2	135.87	135.95	139.85	126.82	178.61	138.05	134.11	142.5	118.25	225.97	111.24	191.73	141.79	126.52	171.4	114.8	193.9	167.51	187.71	155.45	205.02	197.32	152.54	141.46
SM d18_1-20_3	36.54	39.61	38.17	37.38	51.84	31.23	44.85	40.98	36.02	69.07	30.08	60.1	28.45	34.71	43.24	36.69	60.41	40.97	42.33	51.41	67.81	47.55	49.92	41.4
SM d18_1-20_4	1.62	3.67	4.93	0.84	1.51	1.16	6.27	3.52	3.53	7.27	4.98	7.79	3.06	3.53778	4.74	1.78	7.46	2.90222	1.39	4.14	9.23	3.68	5.81	1.75
SM d18_1-20_5	9.22	12.17	6.57	8.69	20.83	13.72	16.21	8.63	11.47	21.19	5.59	14.64	8.97	12.82	10.66	9.43	14.74	15.43	26.82	7.56	23.08	19.42	11.25	11.13
SM d18_1-22_3	527.5	686.39	744.34	654	805.28	721.4	1051.9	584.3	757.61	772.4	1891.01	1117.42	634.98	724.13	626.38	721.87	775.36	681.65	838.09	1083.23	954.61	721.34	871.48	632.02
SM d18_1-22_5	33.22	40.73	49.44	62.51	69.9	64.22	71.49	42.7	30.5	71.15	38.05	38.52	33.64	39.5	39.6	68.61	64.53	62.65	88	40.81	50.8	44.39	60.9	45.94
SM d18_1-22_6	36.23	37.12	43.75	71.6	68.86	43.84	76.87	54.73	29.09	88.85	41.74	48.42	45.93	40.4	49.64	63.85	51.27	45.54	59.86	47	67	50.98	46.72	49.06
Sphingosine	29.75	40.93	53.074	6.48	87.71	142.15	63.33	13.65	73.2	100.31	102.41	69.12	50.79	89.84	115.26	50.293	64.832	31.39	61.92	115.46	115.32	32	64.51	56.91
TAG 46_2	2.735	3.57	3.566	3.86	2.32	6.12	8.82	1.84	5.823	6.12333	4.251	8.72	3.48556	2.54	4.42	9.23	4.83333	6.8	4.72	3.53	8.88	2.5	5.63	6.5
TAG 48_0	36.63	101.68	52.9	25.76	85.92	200.46	177.13	42.2	207.96	24.09	125.3	269.65	84.34	169.74	95.67	326.13	112.59	86.62	122.99	21.8	122.59	67.46	127.74	348.38
TAG 48_1	8.12	40.7	21.9	18.37	64.71	86.84	175.31	23.09	74.72	7.17	57.67	157.18	29.01	72.79	42.62	94.57	42.33	34.99	93.22	11.7	74.65	28.52	63.44	128.48
TAG 48_2	142.9	522.48	230.27	214.48	881.43	1166.9	1423.42	249.73	1352.64	112.57	872.26	1672.92	414.45	706.69	648.81	725.04	647.32	404.1	1268.93	195.16	798.34	472.07	819.18	1049.86
TAG 50_0	794.52	1278.86	696.58	850.99	1028.3	1397.63	1525.65	771.26	1682.48	613.76	1191.62	1530.04	1460.45	2325.56	1047.6	4010.25	1566.12	1463.19	1821.35	698.2	1806.07	1160.1	1300.35	2346.82
TAG 50_1	25.93	80.93	35.66	29.36	93.43	135.52	89.77	78.03	161.3	26.72	116.6	191.63	77.98	121.63	77.01	142.75	91.07	47.68	117.79	35.83	98.1	58.48	95.89	181.34
TAG 50_2	273.24	684.64	271.93	243.9	593.36	1118.58	740.55	542.18	1259.74	242.04	1005.42	1361.52	634.69	603.23	544.2	654.76	724.62	531.21	877.49	266.02	900.87	643.37	713.06	830.56
TAG 50_3	5.63	9.32	12.52	7.4	23.04	46.2	11.11	11.79	50.53	9.28	37.29	65.17	9.74	36.83	29.28	11.4	14.08	27.8	34.1	6.12	36.65	30.37	22.69	19.41
TAG 50_4	119.41	82.34	87.9	57.5	104.3	145.86	150.73	146.99	212.5	71.14	167.93	219.97	74.47	126.61	85.66	92.92	108.65	93.11	103.77	69.34	123.65	104.01	168.07	105.39
TAG 52_2	2010.73	2892.72	2386.47	2305.41	3054.97	3000.12	3478.46	2334.28	3387.14	2240.51	2892.76	4576.63	2834.36	4684.41	2473.02	4961.99	3392.27	2886.58	3426.83	1594.8	3814.97	2983.33	2863.95	4325.78
TAG 52_3	3615.49	4999.88	3641.47	4226.2	5370.96	5552.96	5961.89	4526.26	4796.64	4167.21	4461.45	6216.97	4401.93	5652.77	3838.27	2716.83	4926.41	2280.45	4790.5	2891.03	5644.88	3429.49	5224.87	4128.04
TAG 52_4	2020.04	2337.45	1966.35	1787.29	2601.55	2832.21	2913.88	4058.61	3283.02	2681.09	7414.68	7661.05	2110.71	2500.14	1792.37	1595.04	2456.16	2021.51	2312.62	1618.53	3234.24	2896.26	2995.5	4004.81
TAG 52_5	170.6	160.93	160.79	109.85	191.03	208.87	201.07	142.41	310.56	238.16	315.37	339.91	153.55	205.98	137.22	100.71	167.02	135.25	167.84	152.85	236.12	242.01	277.58	159.31
TAG 52_6	12.78	10.07	14.8	10.12	14.98	16.9	16.74	11.73	28.64	22.59	36.03	26.19	13.18	23.48	8.3	12.58	10.6	18.54	13.66	53.08	17.24	15	29.87	20.07
TAG 54_1	480.79	669.59	651.91	533.01	987.74	1137.53	1013.09	549.84	841.06	610.46	780.58	1369.88	872.68	2292.07	830.32	1869.87	1105.85	1017.42	1768.05	466	1306.25	946.56	618.47	1430.61
TAG 54_2	2107.18	3108.63	2664.49	2432.55	4725.29	4490.96	3673.33	2494.98	3491.97	2826.59	3129.14	4663.19	3751.64	7326.08	3403.23	5393.89	4509.25	4216.23	5669.28	2441.69	4747.06	3780.12	3738.3	4297.01
TAG 54_3	3207.2	3489.48	3850.36	4054.43	5022.26	4262.9	4105.23	3036.54	3640.83	4554.46	4216.56	5155.03	4573.3	5589.47	4006.7	4698.41	4536.69	4364.25	4743.87	3088.97	5016.73	5140.27	5019.08	3947.16
TAG 54_4	11643	11877.3	11573.2	11337.8	13554.8	13312.4	12623.7	11287.7	12975	12834.2	13223.9	13592.2	12445	14306	11181.8	11980	12901.9	12400.3	12873.6	10980.5	13982.1	12754.6	13619.2	11772.6
TAG 54_5	3235.32	2602.34	3637.85	3550.63	3770.96	3261.33	3502.86	2778.55	3376.04	9526	7855.02	3749.32	2780.35	4075.17	2672.86	2796.87	3592.44	3095.9	2643.32	2423.86	8641.74	8204.12	8653.13	2303.55
TAG 54_6	475.93	312.71	661.45	445.97	519.83	535.38	618.36	375.64	598.83	859.04	704.44	736.83	324.99	585.2	411.6	273.26	544.06	322.88	308.16	434.98	600.96	589.34	816.93	323.09

## Sheet: QC
	QC1	QC2	QC3	QC4	QC5	QC6	QC7	QC8	QC9	QC10	QC11	CV
FFA 12_0	594.46	627.02	575.86	609.9	575.36	599.9	1156.09	905.61	677.83	598.13	635.77	0.26404
FFA 12_1	107.68	97.47	99.38	104.79	111.56	108.19	114.07	116.44	112.59	119.5	103.47	0.0641367
FFA 14_0	1597.1	1462.01	1624.5	1591.38	1649.79	1663.01	1980.89	1714.55	1487.78	1573.69	1606.43	0.0836816
FFA 14_1	226.57	193.38	211.41	207.86	217.94	218.32	239.98	237.55	243.61	220.5	224.68	0.0671756
FFA 16_0	9449.56	9665.41	9650.47	9671.42	9811.82	9905.57	9837.49	9722.84	9580.18	9515.03	9558.48	0.0146239
FFA 16_1	3839	3752.14	4010.03	4056.17	4075.14	4141.13	4218.21	3849.87	3845.42	4016.15	4020.12	0.0362056
FFA 16_2	100.94	88.55	97.7	98.5	96.66	98.66	113.45	103.67	93.79	101.36	100.64	0.0623374
FFA 17_0	719.07	652.22	721.22	686.64	708.26	739.21	768.02	737.69	712.1	759.4	707.45	0.0452697
FFA 17_1	216.71	195.2	216.04	213.74	212.7	210.93	212.77	195.18	206.22	208.76	210.04	0.0356033
FFA 18_0	9688.86	9910.78	10299.8	10353.6	10581.6	10425.3	11230.8	10589.2	9927.01	9981.63	10159.5	0.0415994
FFA 18_1	11798.5	12067.6	11982.2	11913.5	12176	12419.6	12086.8	11966.5	12088.9	11848	11913.7	0.0144257
FFA 18_2	10863.1	11160.9	11275.7	11198.9	11302.4	11470.5	11476.7	11184.3	10800.3	10997.9	10827.3	0.0216761
FFA 18_3	3653.01	3427.38	3765.75	3640.5	3856.38	3859.24	4006.24	3755.1	3239.29	3667.34	3656.89	0.0571593
FFA 18_4	27.77	21.11	25.88	25.54	27.92	26.69	26.96	27.55	23.28	26.39	25.65	0.0794409
FFA 20_0	410.61	353.32	436.31	464.22	399.44	425.86	402.09	535.98	378.86	414.34	435.63	0.112872
FFA 20_1	630.17	557.58	635.14	626.31	639.6	647.51	742.46	653.51	640.3	633.95	633.29	0.0661447
FFA 20_2	652.99	596.91	646.92	622.16	656.69	658.73	857.42	692.94	614.79	643.53	640.37	0.105021
FFA 20_3	725.05	676.78	772.15	710.62	777.52	769.45	666.38	645.19	606.73	753.33	697.24	0.0798788
FFA 20_4	2034.82	1941.13	2150.78	2142.32	2203.02	2231.62	2015.56	1938.38	1886.47	2025.06	2029.73	0.0551482
FFA 20_5	44.72	55.67	46.55	58.2	46.91	74.16	44.57	31.84	28.8	43.82	44.1	0.261878
FFA 22_0	266.17	291.19	410.59	292.65	370.91	304.52	373.39	289.51	299.93	373.13	388.25	0.15143
FFA 22_1	262.98	227.13	256.29	248.82	228.8	250.56	261.26	238.61	232.29	246.51	257.37	0.0525664
FFA 22_2	7.65	7.75	10.73	12.56	10.74	7.7	8.45	6.99	8.43	11.17	13.87	0.237361
FFA 22_3	32.46	43.54	28.75	36.25	44	35.57	48.41	53.29	50.26	44.43	32.07	0.201019
FFA 22_4	398.38	345.31	368.04	374.82	382.08	435.72	440.35	414.2	412.1	395.1	418.01	0.0733562
FFA 22_5	680.35	617.25	689.08	654.83	699.72	704.78	707.81	682.29	643.21	656.79	687.95	0.0421851
FFA 22_6	1009.35	939.01	1026.53	1002.74	1077.22	1091.86	1051.32	1041.48	991.6	1068.01	1078.87	0.0445156
LPA 16_0	528.99	562.31	574.94	542.7	559.75	326.17	599.14	624.8	243.89	570.23	536.45	0.230064
LPA 16_1	8.69	11.7867	7.92	9.95	12.83	10.35	8.95	9.05	8.38	11.34	14.17	0.194269
LPA 18_0	283.28	257.13	279.94	262.66	283.98	292.18	302.82	292.4	256.53	275.47	276.99	0.053604
LPA 18_1	162.68	168.37	179.38	176.72	177.21	188.44	187.41	201.13	169.96	193.74	176.15	0.064057
LPA 18_2	368.18	353.36	380.91	366.6	372.41	391.5	439.7	411.03	328.91	381.4	388.17	0.0763445
PA 18_0-20_3	247.977	157.39	276.62	218.57	193.32	275.09	261.27	364.54	238.58	250.1	266.29	0.210776
PC 16_0-22_3	185.51	233.48	302.39	155.34	176.42	172.64	168.97	218.19	162.23	193.72	122.66	0.251047
PC 16_0-22_5	6994.2	6453.62	6749.15	6349.71	5478.65	4418.96	4167.12	4580.68	5493.44	6974.63	7017	0.187121
PC 16_0-22_6	14213.8	10839.1	15648.2	11245.6	11122.8	8529.31	7088.44	8870.13	11442.2	13757.5	14759.8	0.237891
PC 16_1-20_2	15.42	18.16	13.17	17.03	15.94	19.53	23.339	25.92	17.821	27.66	17.26	0.236739
PC 16_1-20_4	247.02	257.77	292.3	264.93	408.4	376.26	457.53	270.34	416.54	435.93	349.18	0.231216
PC 18_1-20_3	1402.12	1681.49	1925.61	1591.88	1088.85	870.38	925.33	1222.08	1409.55	1352.29	1842.35	0.251329
PC 18_2-20_3	1276.31	1505.93	1043.03	1432.53	1458.07	827.38	1238.24	706.68	867.08	1388.67	913.22	0.250421
PC 18_2-20_4	2609.42	2771.26	2594.48	3134.11	2543.32	1983.79	2356.85	1921.74	1568.74	2750.98	2470.34	0.183909
PC 20_0-20_3	67.24	91.65	74.12	107.7	81.93	127.07	39.94	87.73	78.65	70.22	98.44	0.272315
PE 14_0-22_5	12.61	13.85	11.76	9.76	12.98	16.01	10.35	11.59	10.64	13.69	21.87	0.257399
PE 16_0-18_2	1593.49	1738.33	1876.48	1820.52	1360.23	921.41	1450.7	1498.69	1605.34	1103.29	2381.07	0.249284
PE 18_0-20_5	86.2	91.24	85.01	103.81	74.7	64.97	68.97	74.98	51.55	93.65	83.13	0.184209
PE 18_1-18_1	2433.44	2486.72	2393.75	2471.38	1478.73	1543.67	1512.09	2441.54	1056.09	2113.01	2386.43	0.258898
PE 18_1-18_2	1907.88	2071.14	2354.1	3477.52	3168.94	2290.29	3184.34	1823.33	3642.63	2219.3	1884.63	0.268155
PE 18_1-20_4	86.02	91.13	77.16	72.15	67.74	49.17	81	57.17	55.56	103.24	89.35	0.223724
PI 16_0-18_0	179.59	128.07	152.01	171.22	126.17	152.65	183.76	161.83	224.3	165.95	142.23	0.171564
PI 16_0-18_1	1817.48	1858.36	2176.44	2108.84	1596.68	2217.95	3290.73	1928.34	2085.98	2042.68	1608.76	0.221282
PI 16_0-18_2	2882.9	2951.6	2836.47	3280.84	3665.35	2802.73	3755.71	4106.51	3165.25	3344.69	4469.34	0.163115
PI 16_0-20_1	19.86	20.43	21.34	14.82	15.53	9.62	26.36	23.97	15.41	13.9	17.03	0.270057
PI 16_0-20_3	439.44	285.92	376.06	486.22	510.69	277.96	608.58	485.36	537.83	442.43	354.44	0.238443
PI 16_0-20_4	2879.24	1772.95	2583.44	2319.02	1886.02	1877.7	2922.93	2211.83	2436.77	2149.49	2310.16	0.166981
PI 16_1-18_0	243.56	198	258.19	182.09	187.26	325.61	336.34	224.19	219.14	260.82	269.4	0.209198
PI 16_1-18_1	50.67	52.73	61.5	59.64	61.89	42.62	63.25	93.54	75.9	57.16	54.4	0.222787
PI 16_1-18_2	18.67	16.02	19.02	15.24	15.69	19.44	28.32	16.88	29.52	31.49	18.55	0.287095
PI 18_0-18_0	208.2	164.54	180.71	139.69	207.97	158.03	301.14	285.28	148.72	168.21	175.67	0.274867
PI 18_0-18_1	2587.88	1759.22	1765.48	1945.02	2115.61	2185.82	3013.35	1604.69	1995.42	1900.41	2063.15	0.193445
PI 18_0-18_2	8018.49	9445.09	9993.14	6965.59	7348.11	6036.1	11350.2	9585.3	9496.3	8985.68	11457.5	0.192886
PI 18_0-18_3	57.4	49.05	51.68	41.94	67.52	46.88	70.37	95.93	79.52	67.43	81.94	0.261339
PI 18_0-20_2	390.51	349.11	388.91	340.41	366.84	334.11	534.53	445.48	436.59	491.65	459.32	0.159894
PI 18_0-20_3	3448.23	2964.29	3324.38	2508.93	2541.4	3102.18	3925.47	5046.42	3965.25	3072.74	3245.87	0.214551
PI 18_0-20_4	13842.9	8702.38	10196.4	10412.4	12201.9	14923.1	13303.2	12540.5	12599.3	14437.2	11335.1	0.156886
PI 18_0-20_5	79.58	72.72	75.84	62.89	63.7	49.38	110.02	74.56	65.04	72.01	79.9	0.20627
PI 18_0-22_4	109.28	113.72	103.34	134.47	107.41	133.78	172.97	132	115.38	101.32	157.51	0.184669
PI 18_1-18_1	1207.16	1353.24	1279.53	1505.69	1171.2	1001.97	2450.32	1939.87	1780.76	1785.08	1657.04	0.269148
PI 18_1-18_2	1532.5	1101.26	1024.4	1413.76	1414.73	1059.4	1614.5	2284.5	1400.64	1198.17	2043.64	0.273904
PI 18_1-18_3	16.74	8.01	17.05	16.04	9.68	17.97	12.2	12.45	10.23	9.43	17.1	0.277204
PI 18_1-20_3	160.4	89.88	146.3	140.84	115.83	124.93	199.34	175.44	156.81	148.33	158.37	0.200889
PI 18_2-18_2	246.31	169.97	223.37	201.93	214.7	184.29	275.15	297.57	247.67	138.82	211.19	0.210671
PI 18_2-20_1	17.15	16.28	14.83	12.31	11.58	12.04	25.05	20.09	11.49	10.78	16.28	0.287038
PI 20_0-20_4	20.55	14.05	12.14	14.97	18.63	10.55	24.57	18.4	18.64	15.29	12.15	0.257315
SM d18_1-12_0	200.32	151.72	178.41	178.39	163.95	182.82	196.09	191.82	181.05	180.92	171.12	0.0779449
SM d18_1-16_0	6618.57	6604.64	6544.11	6538.13	6712.29	6656.38	6921.71	6650.69	6594.32	6918.1	6825.93	0.0207813
SM d18_1-16_1	1604.56	1573.36	1703.09	1674.49	1698.36	1583.8	1716.05	1660.44	1686.83	1672.38	1633.22	0.0298425
SM d18_1-17_0	1082.03	985.57	1080.8	1062.18	1121.39	1080.72	1136.84	1083.59	1086.31	1060.64	1065.71	0.035614
SM d18_1-18_0	5349.26	4992.99	5413.28	5456.03	5622.19	5536.72	5231.41	5216.17	5236.02	5263.74	5344.18	0.0325262
SM d18_1-18_1	5097.56	4913.28	5208.58	5141.2	5219.87	5120.45	5054.11	4974.73	5089.69	4929.78	5109.67	0.0201628
SM d18_1-18_2	491.12	406.01	459.94	435.39	454.17	446.17	470.81	473.21	416.88	438.42	465.68	0.0561886
SM d18_1-18_3	67.28	58.17	61.86	61.22	64.11	66.22	71.59	65.38	59.52	60.63	63.74	0.0611564
SM d18_1-20_0	7763.56	7424.73	5471.58	5455.98	5516.15	5694.82	7415.18	7430.6	7247.62	7675.26	7681.25	0.14914
SM d18_1-20_1	3437.82	3060.12	3240.38	3208.51	3241.4	3328.22	3308.33	3327.8	3201.32	3358.35	3362.15	0.031381
SM d18_1-20_2	168.6	149.86	158.9	158.07	158.9	158.76	161.26	165.49	149.31	163.55	169.25	0.0408569
SM d18_1-20_3	52.8	42.86	45.4	22.52	48.78	46.75	52.71	46.14	45.35	48.81	48.54	0.18028
SM d18_1-20_4	6.12	5.14	7.32	5.6	6.11	6.09	5.65	5.18	5.74	4.38	5.36	0.131038
SM d18_1-20_5	16.89	10.48	15.31	13.94	12.34	16.45	13.38	10.44	14.33	12.13	12.8	0.159853
SM d18_1-22_3	842.38	734.26	476.37	693.52	886.77	776.79	1071.15	836.31	811.5	830.69	834.62	0.18012
SM d18_1-22_5	74.16	63.28	115.94	112.35	113.39	108.63	77.28	67.18	68.28	64.35	62.71	0.271311
SM d18_1-22_6	65.86	59.86	114.7	103.62	105.42	107.11	61.67	60.36	65.01	62.56	59.97	0.294657
Sphingosine	59.9	87.64	110.89	124.68	116.71	95.22	102.97	111.89	43.84	71.13	91.08	0.273172
TAG 46_2	13.99	12.18	9.35	6.95	8.43	12.78	13.63	6.82	8.52	15.65	10.01	0.281574
TAG 48_0	269.09	245.28	300.54	314.73	279.83	257.07	261.76	276.84	287.57	276.32	252.55	0.0757985
TAG 48_1	137.78	115.74	145.1	124.93	138.62	101.84	130.16	119.22	126.21	138.11	124.39	0.0974204
TAG 48_2	1119.47	1021.11	1113.55	1204.22	1160.7	1125.47	1017.72	1059.48	1139.57	1143.12	1064.97	0.0531755
TAG 50_0	2147.63	2136.35	2264.25	2276.91	2174.52	2131.41	2120.86	2179.18	2479.91	2128.64	2096.32	0.0504849
TAG 50_1	134.34	143.53	159.47	146.16	152.97	149.62	146.34	158.93	192.82	154.48	161.11	0.0969748
TAG 50_2	817.3	767.88	936.69	988.36	965.49	987	814.63	722.01	1099.56	743.8	874.54	0.136832
TAG 50_3	43.51	44.21	47.23	31.43	53.53	21.83	39.48	39.33	27.02	23.71	51.15	0.285227
TAG 50_4	153.07	249.57	147.06	159.76	171.72	156.18	155.74	151.36	135.04	162.34	162	0.182341
TAG 52_2	4823.54	4473.32	5248.71	5016.64	4811.54	4691.89	4395.92	4496.65	4687.65	4507.99	4689.85	0.0540762
TAG 52_3	4958.86	4590.82	6814.68	6522.66	6439.67	6599.6	5399.26	5523.97	5797.92	5305.23	5823.45	0.124997
TAG 52_4	6399.9	3968.5	3463.26	3143.9	3236.44	4311.01	5836.2	3079.11	3504.7	3065.62	3106.43	0.296728
TAG 52_5	255.59	238.61	242.1	242.3	252.29	238.41	235.43	239.57	228.15	235.16	218.93	0.0423103
TAG 52_6	28.05	19.71	23.62	19.78	21.72	16.46	27.24	24.17	24.23	20.55	22.18	0.151556
TAG 54_1	1669.23	1497.1	1786.57	1755.23	1782.29	1599.48	1560.57	1600.15	1706.6	1669.57	1725.68	0.0567338
TAG 54_2	5555.88	4889.58	6071.31	5904.01	6084.02	5538.97	4816.98	5237.47	5491.62	5756.46	5507.36	0.0766462
TAG 54_3	5906.19	5663.21	6701.76	6668.49	6515.46	6442.52	5525.74	5750.24	4993.4	6042.44	5702.69	0.0900757
TAG 54_4	14096.4	13347.9	14925.3	14702.2	14705.7	14846.8	14419.6	14516.9	14262.4	14959.1	14243.6	0.032398
TAG 54_5	9324.29	8786.08	9355.25	9340.84	9628.92	9406.87	4588.54	9107.99	4506.2	9116.46	9220.04	0.228111
TAG 54_6	853.59	729.06	913.37	870.4	863.73	914.19	749.34	787.61	743.85	861.24	832.12	0.0802437
CE 14_0	0.98	0.89	1.29	1.31	1.46	1.13	2.29	1.27	1.48	0.93	1.17	0.299168
CE 16_0	6.04	4.92	4.31	4.42	6.57	7.23	4.41	4.65	3.59	7.79	5.75	0.248331
CE 16_1	2.27	0.98	2.04	1.35	1.55	1.01	2.5	2.41	1.84	1.56	1.79	0.298267
CE 17_0	2.32	1.61	1.42714	1.53	0.94	1.69	1.77	1.18	2.49	2.08	1.36	0.282013
CE 18_0	3.82	6.37	6.14	3.57	6.62	6.09	5.74	5.8	3.76	5.72	4.06	0.224767
CE 18_2	279.89	288.18	324.57	284.37	320.52	312.79	333.16	360.01	366.41	268.3	261.11	0.115359
CE 20_0	1.79	2.95	2.04	1.93	1.68	1.81	2.66	3.04	1.35	2.22	1.89	0.254614
CE 20_2	2.36	1.24	1.53	1.18	1.29	0.95	1.27	1.3	1.16	1.24	0.95	0.290576
CE 22_0	2.6	1.55	1.62	1.08	1.35	1.49714	1.513	2.59	1.807	1.78	1.475	0.27847
Cer d18_1-16_1	1050.13	882.83	767.44	629.58	637.45	645.65	841.98	900.45	804.34	941.37	875.75	0.166452
Cer d18_1-18_1	56.83	50.61	71.45	47.91	56.38	41.35	57.6	37.79	47.19	58.28	51.37	0.175535
Cer d18_1-20_1	33.71	36.25	35.18	24.79	38.44	26.4	47.48	38.1	35.36	33.76	39.33	0.17389
Cer d18_1-20_4	949.82	787.15	615.72	994.78	740.63	541.99	1016.6	944.56	803.19	982.09	1028.38	0.19727
Cer d18_1-22_0	1647.54	1380.33	989.16	893.34	1346.02	1431.24	1457.4	1526.23	1375.38	1515.83	1580.58	0.170497
Cer d18_1-22_1	430.64	324.88	474.05	490.48	522.96	484.7	370.28	369.93	374.93	424.38	419.56	0.145555
Cer d18_1-22_2	2392.36	2078.68	2159.31	1334	1186.08	2026.69	2488.85	2549.92	2136	2399.47	2419.33	0.215625
Cer d18_1-22_3	158.56	123.57	166.6	187.74	123.91	152.34	138.74	162.81	150.72	200.2	134.77	0.158161
Cer d18_1-22_5	804.22	635.58	294.06	647.878	302.24	558.729	687.45	753.57	765.61	635.15	763.58	0.282947
Cer d18_1-22_6	58.99	63.34	31.86	44.984	28.13	29.62	64.94	66.56	53.45	57.42	63.04	0.291932
DAG 12_0-16_0	1.97	2.98	3.15	2.31	3.37	2.54	3.65	1.78	1.63	1.57	2.21	0.293866
DAG 12_0-18_2	2.79	4.07	3.76	3.9	2.89	4.08	5.49	3.37	5.58	5.61	3.85	0.24628
DAG 12_0-18_3	32.27	31.25	17.23	17.63	16.93	40.27	22.9	31.05	19.08	30.05	28.04	0.298001
DAG 14_0-16_0	5.74	10.73	6.55	8.65	9.16	11.36	4.71	9.28	6.54	9.17	11.69	0.274338
DAG 14_0-18_0	10.09	9.86	8.62	4.49	4.09	10.71	5.82	9.28	7.5	11.01	7.62	0.299659
DAG 14_0-18_1	4.53	4.19	6.85	5.61	6.45	6.88	8.07	9.46	6.47	8.07	10.76	0.280944
DAG 14_0-18_2	2.44	2.13	2.26	4.33	2.85	3.67	3.78	2.71	2.24	2.722	2.63125	0.249794
DAG 14_1-18_1	38.25	53.42	33.58	24.38	34.31	26.09	37.06	29.12	36.64	37.67	49.9	0.244718
DAG 14_1-22_4	14.32	16.48	9.01	9.5	8.88	12.12	8.24	9.21	10.04	13.78	12.34	0.240661
DAG 14_1-22_5	3.81	3.07	4.08	2.63	5.07	4.94	2.41	2.61	3.51	2.37	4.02	0.27746
DAG 14_1-22_6	1.76	1.45	1.32	2.86	1.92	2.67	1.74	1.37	1.52	2.59	1.61	0.293536
DAG 16_0-16_0	359.2	419.39	297.96	280.07	274.39	349.32	308.85	247.08	329.71	310.02	394.59	0.161266
DAG 16_0-16_1	9.23	11.6	14.99	12.16	14.41	14.65	5.17	10.24	9.97	7.2	8.25	0.298705
DAG 16_0-18_0	429.45	377.17	437.93	378.17	314.2	326.51	353.92	274.85	285.46	366.87	442.9	0.161884
DAG 16_0-18_1	15.6	15.15	16.2	15.82	10.17	16.02	17.75	10.88	10.88	10.85	11.94	0.202841
DAG 16_0-18_2	11.24	19.32	26.32	24.17	15.89	17.84	14.91	17.4	15.09	19.29	14.15	0.247391
DAG 16_0-20_1	2.2	3.17	2.01	1.35	1.48667	2.17	1.62	2.39	1.65	1.61	1.99	0.263253
DAG 16_0-20_4	6.66	8.46	5.21	9.42	6.02	6.55	10.67	4.55	7.39	4.68	9.31	0.287266
DAG 16_1-16_1	1.92	1.25	1.27	0.95	1.43	1.76	1.23	1.37	1.28	1.42	1.37	0.188958
DAG 16_1-18_0	1.69	1.86	1.55	1.72	1.57	1.55	1.76	1.38	2.94	1.45	2.46	0.260881
DAG 16_1-18_1	2.94	5.5	2.61	4.41	3.47	3.74	2.76	4.71	3.97	5.85	3.87	0.266804
DAG 16_1-18_2	6.83	4.29	5.27	5.06	5.08	4.07	3.19	8.34	5.3	5.61	4.36	0.26816
DAG 18_0-18_0	416.54	523.11	287.19	307.83	329.54	298.55	259.43	335.22	207.01	230.35	416.48	0.281828
DAG 18_0-18_1	3.08	3.97	3.11	2.73	4.21	3.46	5.36	4.99	3.07	3.51	3.18	0.229294
DAG 18_0-18_2	6.23	8.94	5.21	7.4	7.87	6.16	7.96	13.06	12.84	9.03	8.6	0.297006
DAG 18_0-20_0	9.24	5.8	4.45	7.42	8.27	7.63	10.09	3.72	7.39	4.7	7.18	0.292833
DAG 18_0-20_1	2.32	1.45	1.27	1.47	1.19	1.37	1.16	2.56	2.09	1.35	1.67	0.294858
DAG 18_1-18_1	42.97	34.26	59.95	30.6	57.8	56.19	54.68	37.81	76.77	52.75	54.76	0.262931
DAG 18_1-18_2	49.05	47.38	81.94	38.31	58.29	65.63	68.39	56.76	59.19	52.7	65.37	0.202633
DAG 18_1-18_3	6.06	10.72	14.7	10.31	14.17	12.7	5.93	8.8	10.14	9.73	11.59	0.273249
DAG 18_1-20_0	1.29	1.43	1.37	1.33	1.49	1.55	1.5	0.91	1.11	1.26	1.69	0.159255
DAG 18_1-20_1	1.77	1.38	1.58	1.5	1.51	1.35	1.62	1.61	1.34	2.28	1.15143	0.189452
DAG 18_2-18_2	72.49	81.57	125.52	121.9	75.94	120.36	84.71	94.75	96.71	85.56	74.21	0.211949
DAG 18_2-20_0	3.24	1.36	1.62	1.72	1.65	2.05	2.78	1.93	2.06	1.85	2.61	0.273681
DAG 18_2-20_1	4.57	2.13	2.03	3.73	3.14	3.24	4.02	4.96	4.16	4.12	2.43	0.282617
DAG 18_2-20_2	1.9	3.65	2.62	2.25	1.84	2.1875	2.43	2.66	2.46	1.94	2.7	0.210999
DAG 20_0-22_1	1.15	2.16	1.35	1.33	1.21	2.73	2.01	2.41	1.73	2.3	1.67	0.293955
DAG 20_0-22_6	22.76	16.76	24.71	31.86	22.82	23.93	29.35	22.77	30.49	19.31	31.35	0.200221
DAG 22_0-22_2	2.18	1.415	0.96	1.16	1.87	1.63	1.37	1.42	2.11	1.16	1.18	0.271035
HexCer d18_1-12_0	80.77	55.73	81.68	65.38	85.37	75.97	57.63	58.03	50.25	59.89	49.18	0.201732
HexCer d18_1-14_0	48.23	32.8	65.77	47.98	28.82	38.24	44.67	44.95	51.32	43.88	43.87	0.218317
HexCer d18_1-16_1	1931.45	1452.19	987.76	1152.02	904.8	942.78	1603.35	1783.83	1183.85	1914.4	1827.15	0.284555
HexCer d18_1-18_0	628.42	568.4	494.44	571.981	545.374	394.42	681.31	605.99	682.82	644.3	731.94	0.160768
HexCer d18_1-20_0	921.51	664.52	865.49	845.76	729.38	802.33	927.81	931.69	849.29	964.75	837.54	0.107061
HexCer d18_1-20_1	11.14	7.5	5.62	9.316	10.411	10.18	8.56	8.688	15.14	6.39	7.13	0.290673
HexCer d18_1-20_2	189.49	192.02	185.57	202.54	178.43	181.74	223.64	215	178.5	221.81	203.88	0.0855662
HexCer d18_1-22_0	9074.75	8532.02	8440.86	8000.84	8380.63	7420.84	9055.91	8753.57	8473.48	8543.22	8905.69	0.0564058
HexCer d18_1-22_1	779.65	704.73	459.29	492.49	489.6	465.95	747.28	733.58	693.78	730.45	763.52	0.207618
HexCer d18_1-22_3	87.44	79.41	74.4	49.24	61.86	52.15	100.13	83.78	73.19	80.39	85.16	0.205018
LPC 15_0	233.42	202.63	249.18	241.39	231.57	231.76	263.54	240.46	217.8	245.52	225.01	0.0695335
LPC 16_0	2348.49	2243.11	2506.47	2521.79	2442.25	2523.62	2407.93	2345.88	2203.58	2300.19	2364.37	0.045968
LPC 16_1	669.46	575.34	681.89	699.86	697.8	716.87	721.95	699.13	660.57	651.24	634.41	0.0631395
LPC 18_0	560.55	447.03	577.17	537.93	556.73	586.68	596.59	536.36	485.17	526.09	544.65	0.0812083
LPC 18_1	393.74	318.98	401.34	334.1	372.32	407.98	362.15	350.47	300.5	332.55	337.34	0.0988024
LPC 18_2	1230.02	1088.52	1264	1300.98	1240.39	1295.92	1265.8	1224.66	1063.29	1171.98	1226.26	0.0641818
LPC 18_3	315.41	263.41	300.25	321.71	326.71	322.55	317.25	301.62	288.73	305.13	257.17	0.077855
LPC 20_0	88.57	77.08	85.81	77.3	75.85	85.82	95.85	97.44	83.77	92.13	79.79	0.0884057
LPC 20_3	1196.72	1005.92	1159.95	1108.68	1188.04	1202.83	1235.15	1195.91	1015.42	1123.96	1008.51	0.0756395
LPC 20_4	1730.7	1586.57	1741.54	1731.44	1760.2	1877.12	1878.93	1851.01	1695.2	1713.97	1715.89	0.0497173
LPC 20_5	136.44	119.83	149.63	149.46	146.54	173.03	151.11	134.88	125.19	130.33	126.58	0.109915
LPC 22_1	94.9	88.51	109.02	149.6	105.21	128.19	106.44	114.17	76.98	80.01	150.3	0.22858
LPC 22_4	92.99	88.07	88.68	83.17	97.3	95.18	106	96.67	91.56	96.26	99.81	0.0663061
LPC 22_6	566.96	481.96	573.14	563.55	587.21	628.19	659.46	589.5	528.5	599.62	557.29	0.0819
LPC 24_0	55.16	53.98	53.44	51.87	55.65	56.7	68.08	64.81	54.71	54.39	55.49	0.0882485
LPC O-16_0	237.15	200.52	248.92	238.01	230.95	239.67	241.13	234.68	233.61	236.23	234.63	0.0517408
LPC O-18_0	380.41	339.43	393.81	393.36	417.06	422.39	411.96	413.76	379.27	377.03	360.64	0.0661283
LPC P-18_1	3.6	3.69	4.08	3.77	3.43	4.3	4.28	5.36	4.73	3.47	4.54	0.146294
LPC P-20_0	17.25	20.21	22.83	21.1	22.89	23	25.04	17.77	17.86	21.8	19.28	0.122898
LPE 12_0	2.03	1.3	0.94	1.34556	2.4	1.7	1.748	0.91	1.57778	1.28	1.34143	0.296616
LPE 16_0	183.66	157.4	262.74	185.34	150.89	108.17	295.65	289.21	156.8	212.24	209.64	0.299571
LPE 17_1	1.65	1.1575	1.36	1.49	0.82	1.34571	1.56	1.09	0.71	0.83	0.91	0.27914
LPE 18_1	3.72	4.05	2.27	2.67	4.48	4.26	5.03	5.21	4.19	2.79	2.36	0.281866
LPE 18_2	1.89	0.87	1.38571	1.28	1.41	1.67	1.68	0.94	0.79	1.314	1.21	0.267209
LPE 20_0	2.74	5.75	5.76	5.44	7.18	4.81	7.06	8.05	4.41	6.31	6.293	0.252603
LPE 20_1	9.32	14.96	15.48	12.47	15.55	10.42	21.08	19.57	10.34	15.03	13.65	0.257848
LPE 20_2	6.05	6.02	7.86	5.726	4.02	7.07	8.54	7.03	4.99	5.62	10.84	0.279864
LPE 20_3	39.51	48.91	56.26	21.68	46.78	35.2	69.09	61.88	35.69	42.32	48.09	0.28989
LPE 20_4	172.89	209.94	295.5	183.28	202.64	170.96	298.6	283.78	196.27	174.64	250.96	0.229332
LPE 20_5	9.48333	12.2456	13.06	11.46	10.83	6.88	12.34	16.9	7.93	11.078	10.942	0.237891
LPE 22_0	7.38	7.72	5.12	5.24	5.03	4.87	10.68	9.2	5.28	5.89	8.05	0.291001
LPE 22_1	1.11	1.33	1.26	0.91	1.36	0.86	1.12	1.98	1.31	0.81	0.79	0.295433
LPE 22_3	1.15	1.63	1.46	1.55	2.16	1.08	2.73	1.72444	1.77	1.46	1.315	0.287132
LPE 22_4	33.18	36.19	27.2	24.964	31.73	21.94	33.88	44.46	27.56	36.93	37.64	0.201895
LPE 22_5	42	50.29	55.03	32.25	44.6	33.66	56.23	45.28	32.82	37.89	57.03	0.213414
LPE 22_6	174.36	174.04	136.02	102.43	135.64	189.7	159.05	185.42	190.06	167.14	279.96	0.260615
MAG 16_0	875	696.05	559.67	594.24	535.22	605.6	672.73	686.59	758.37	725.4	825.01	0.157035
MAG 16_1	8.35	10.38	10.8	8.58	6.35	8.79	7.91	5.79	6.57	12.1	7.1	0.236804
MAG 18_0	737.54	722.22	706.81	644.63	664.31	570.9	611.66	687.73	584.76	687.45	823.37	0.10811
MAG 18_1	26.25	32.41	24.97	27.21	23.89	24.01	35.66	35.17	26.78	32.41	26.3	0.153981
MAG 18_2	13.11	11.76	12.87	8.27	12.78	11.81	9.48	7.26	10.11	12.24	8.74	0.192467
MAG 20_4	1.86	1.93	2.8	2.27	2.06	3.21	2.23	3.54	2.64	2.62	3.83	0.249702
MAG 22_5	73.71	90.61	64.98	55.72	54.83	50.77	69.4	64.51	73.47	77.4	58.97	0.175395
PC 16_0e-16_0	2903.37	2661.18	4266.29	4930.66	4664.17	4865.58	3398.44	3618.32	2669.21	2728.19	3444.16	0.244739
PC 16_0e-16_1	2374.54	1770.01	3025.44	2810.16	2857.57	3090.19	2345.28	2242.47	1710.87	1905.74	2370.32	0.202893
PC 16_0e-18_0	1699.03	1517.57	1700.26	1786.14	1797.67	1701.67	1666.09	1686.03	1480.16	1714.85	1737.18	0.0587188
PC 16_0e-18_1	7274.56	5936.98	7978.31	7588.49	7863.77	8133.98	7073.27	6895.48	6203.46	6800.96	6153.73	0.108213
PC 16_0e-18_2	10825.1	9892.19	5355.62	5300.12	6189.08	6117.32	10811.4	10324.1	9972.01	11275	9782.59	0.276807
PC 16_0e-20_1	2606.85	2328.05	2308.96	2072.84	2305.15	2165.45	2587.55	2536.89	2529.72	2699.29	2775.22	0.0917664
PC 16_0e-20_2	6628.89	6120.99	6569.9	7500.77	6331.16	6014.33	7335.39	7302.55	5959.58	6156.34	6682.33	0.0844389
PC 16_0e-20_4	17193.7	17053.5	14022.4	13952	7143.84	16118.5	17921.7	17308.3	16153.1	17475	16813.4	0.198317
PC 16_0e-22_5	26150	21758.6	22285.3	26093.9	24554.2	25991.3	27917.1	27064	24032.7	22124.8	28738.5	0.0951243
PC 16_0e-22_6	9336.91	8376.32	13240.5	13748.8	13308.2	13561.9	9571.02	9542.05	8483.73	9262.1	9306.8	0.207937
PC 16_0p-16_1	356.24	213.31	351.87	375.98	400.22	316.99	280.46	416.17	228.6	242.2	350.33	0.218905
PC 16_0p-18_0	6222.95	5252	7354.86	7014.71	7744.29	7740.28	6535.41	6360.64	5997.96	5971.74	7002.26	0.118889
PC 16_0p-18_1	11543.6	10143.1	13228.9	12175.9	12047.4	11116.7	10063.3	9773.05	9827.3	10585.4	11964.1	0.103017
PC 16_0p-18_3	106.74	148.79	124.28	211.42	159.28	129.8	157.86	185.09	152.18	117.56	150.31	0.20245
PC 16_0p-20_0	2525.46	2272.5	2473.44	2163.07	2284.27	2700.25	2489.3	2748.86	2523.38	2580.26	2670.61	0.0751258
PC 16_0p-20_1	8010.27	5752.32	6710.82	7606.91	5783.51	6126.39	7584.87	7327.94	6554.37	6491.3	7031.53	0.111819
PC 16_0p-20_2	6869.13	7427.83	5021.22	5339.32	5405.24	4887.2	7377.81	6782	6244.79	7303.72	7080.84	0.157315
PC 16_0p-20_4	18033.4	13967.7	19040.5	21214.8	20662.2	20119	21536.2	20087.8	17916	17563.8	18821.3	0.112984
PC 16_0p-22_6	2160.13	1953.54	2402.88	1365.46	1730.54	1590.61	2218.03	2192.27	2057.64	2726.75	2209.12	0.185869
PC 18_0e-16_0	1808.56	1435.05	1797.67	1774.86	1802.63	1881.88	1676.34	1634.65	1441.1	1865.37	1801.02	0.091153
PC 18_0e-16_1	7322.51	6280.56	8078.88	7776.48	7715.29	7519.89	6933.22	6863.6	6939.72	6985.94	6915.97	0.0721817
PC 18_0e-18_0	313.9	244.95	269.16	268.61	347.41	292.73	380.96	291.35	295.4	342.13	303	0.130003
PC 18_0e-18_1	2501.72	1827.83	2146.19	2210.33	2530.65	2572.18	2683.68	2124.85	2348.97	2501.23	2589.16	0.109979
PC 18_0e-18_2	6524	5635.03	6213.7	6046.31	5943.68	5811.78	7096.72	7534.93	5948.16	7416.08	6714.1	0.102959
PC 18_0e-18_3	7488.81	7271.89	5786.96	5670.5	5443.07	5309.26	7929.34	7145.44	7050.74	7721.37	8014.71	0.153078
PC 18_0e-20_4	14609.2	14489.4	15411.6	15906.3	14644	15683.5	12023.2	12775.1	14351.2	14931.4	15600	0.0831127
PC 18_0p-14_0	4801.15	4023.92	6264.48	5242.07	5708.28	6061.79	5099.5	4891.7	4397.42	3776.38	4887.09	0.156679
PC 18_0p-14_1	278.6	324.83	424.06	368.64	335.35	268.67	310.11	289.74	273.43	371.37	362.53	0.151668
PC 18_0p-16_0	7057.4	6693.88	8087.07	7235.09	7706.56	8135.05	7447.12	7243.54	6821.78	7129.93	7764.9	0.0650971
PC 18_0p-16_1	11118.6	9203.04	12591.5	11110.8	11577.5	10531.1	10528.2	11004.8	8832.95	9655.07	11133.3	0.102023
PC 18_0p-18_0	2527.21	2258.85	2342.72	2312.88	2235.18	2345.02	2165.83	2640.02	2463.32	2737.44	2794.29	0.0866759
PC 18_0p-18_1	7245.29	6515.61	6461.85	6273.05	5023.41	6221.79	7662.19	7419.2	6004.7	6778.65	7807.19	0.123205
PC 18_0p-18_2	7564.58	7523.9	5586.26	5489.92	5384.65	5056.65	8012.4	7902.8	6658.68	7586.28	8245.87	0.178106
PC 18_0p-18_3	17085.4	16836	11345	7838.75	17170.9	10764.7	17899.7	15649.5	16187	16765.1	17697.8	0.226377
PC 18_1e-16_0	6935.75	5373.51	7771.53	7770.96	7868.19	7808.17	6733.85	7222.11	6726.19	6669.08	7237.46	0.104372
PC 18_1e-18_0	2495.64	2306.94	2421.93	2177.11	2225.11	2164.38	2009.51	2560.89	2501.86	2741.82	2573.37	0.0925618
PC 18_1e-18_1	6546.34	6792.12	5295.13	6005.8	7319.19	5662.6	7857.29	7436.48	6719.01	7638.33	7780.75	0.128704
PC 18_1e-18_2	7609.91	7450.99	5254.55	5368.62	5537.75	5335.53	7392.43	7357.22	7361.77	7382.16	8067.85	0.163495
PC 18_1e-18_3	16251.9	17668.8	14049.4	6300.3	14325.5	13160.3	21430.5	16940.4	16761.2	16608.1	19447.1	0.249572
PC 18_1e-20_4	26018.9	21654.2	25332.2	24628.6	23125.9	25610.9	29795.9	25930.1	26176	22855.3	23892.8	0.0871166
PC 18_2e-12_0	12.7989	12.89	14.28	16.66	17.01	13.08	14.0567	9.14	10.34	9.29	12.94	0.201328
PC 18_2e-16_0	11292.9	10265.1	5126.72	5102.83	7034.16	6927.28	10432.7	10052.3	8648.34	11234	10224.8	0.26616
PC 18_2e-16_1	9873.87	9079.18	7329.04	7255.59	5811.15	6547.2	7923.74	6916.54	6057.53	5437.86	5766.63	0.199412
PC 18_2e-18_0	6738.05	6267.11	6535.32	5996.4	6442.84	6001.83	8055.47	7588.36	6763.77	7354.94	7045.48	0.0968438
PC 18_2e-18_1	7928.67	7745.37	5477.79	5450.38	5690.29	4714.71	7662.03	7667.68	7063	7619.7	8042.08	0.180024
PC 18_2e-18_2	17480.5	16424.6	7757.16	8520.28	12081.3	12524	18795.7	17172.6	19818.4	17250.7	17525.7	0.27514
PC 18_2e-18_3	20408.7	18225.6	22704.2	23349.7	21398.6	28191.2	22441	22239.5	20130.3	19007.4	20512.6	0.123407
PC 18_2p-16_1	110.69	132.19	163.31	121.86	116.72	136.32	149.93	131.16	163.66	197.37	142.61	0.176636
PC 18_2p-18_0	7936.18	7514.38	5274.64	5632.41	5507.44	4877.5	7927.87	8038.52	7081.44	7900.81	8074.11	0.186458
PC 18_2p-18_1	17405.7	16801.5	8795.62	8380.8	12061.9	8545.1	18160.5	17146	17131.8	17175.1	18135.2	0.286273
PC 18_2p-18_2	19427.4	19641.3	26559.2	21799.5	19691.8	23199.9	21999.8	20675.9	19202	17669.3	20756.3	0.114762
PC 18_2p-20_3	13369.6	12299.6	13408.7	13507.6	13045.9	12556	11694.7	11157.1	12939.2	13161.6	13550.5	0.0615583
PC 18_2p-20_4	2891.11	2429.06	1859.7	2507.62	2971.6	2966.83	2963.63	3490.58	4303.05	3232.86	3756.42	0.219538
PC 18_2p-20_5	29693.3	25286.5	41432.3	40219.8	38183.1	26928.4	37405.4	37893.9	33803.8	37837.4	29202	0.164429
